# Supplementary material for: Genome-wide identification, evolution, and expression of the SNARE gene family in wheat resistance to powdery mildew
Source: PeerJ. 2021 Jan 22;9:e10788. doi: 10.7717/peerj.10788 (PMC7831368; doi:10.7717/peerj.10788)
Supplement: Supplemental Information 1 [file peerj-09-10788-s001.xlsx]

## Sheet: Sheet3
Gene ID	Name	Type	ORF(bp)	Seq 1.0	length(aa)	MW(kD)	pI
TraesCS6A02G147100	TaSYP111-6A	Qa	921	MNDLMTDSFVGAAAAAPQAKRQQDGGPTAGVEKLQAFLAEAEAAKNEMAALRNELSQLQSAHEASKSLLRPGAPRAATQAALVRLLGSARRLRARLASMDRRAPAPAAHATAGLRGRLQDLTAGVQTLRRQVSAERRGDAARCYLAVAGEAPTEDQLDRLVASGGAGADDADEAMRAAMLSSSEAEKVEGGLLELQQLFLDMAALVESQGPLLEDVERHVAAAAEDVGAAEGELREARRLQGAARRRRMWLGGGLAALLLVALAVAAVVVALALARRKGGRVQLAGAGLSGLGEFASVGVFRFLGL*	306	31780.3	8.92
TraesCS6B02G175300	TaSYP111-6B	Qa	921	MNDLMTHSFVGAAAAAPQAKRQQDGGSAAGADKLQAFLAEAEAAKNEMTALRNELSQLQSAHEASKSLLRPGAPRAATQAALVRLLGSARRLRARLASMDRRAPAPAAHATAGLRGRLQDLTAGVQTLRRQVSAERRSDAARCYLAVAGEAPTEDQLDRLVASGGVGANGADEAMRAAMLSSSEAEKVEGGLLELQQLFLDMAALVESQGPLLDDVERHVAAAAEDVGAAEGELREARRLQGAARRRRMWLGGGLAALLLVALAVAAVVVALALARRKGGSVQFAGAGLSGLGEFASVGVFHFLGL*	306	31681.1	9.34
TraesCS6D02G136400	TaSYP111-6D	Qa	921	MNDLMSDSFVGAAAAAAQAKRQQDGVPAAGAEKLQAFLAEAEAAKNEMAALRNELSQLQSAHEASKSLLRPGAPRAATQAALVRLLGSARRLRARLASMDRRAPAPAAHATAGLRGRLHDLTAGVQTLRRQVSAERRGDAARCYLAAAGEAPTEDQLDRLVASGGAGANDADEAMRAAMLSSSEAEKVEGGLLELQQLFLDMAALVESQGPLLDDVERHVAAAAEDVGAAEGELREAQRLQGAARRRRMWLGGGLAALLLVALAVAAVVVALALSRRKGGSVQLAGAGLSGLSEFASVGVFRFLGL*	306	31639	7.96
TraesCS4A02G247700	TaSYP112-4A	Qa	951	MNDLMTKSFMSYVDLKKAAMKDLEAGGDETGTELTQAGGGGATDERLKGFFREAEAVREEMAAIRDALARLHAANEEGKSLHQPDALRAMRVRVNADIVAVLGRARGIQRALADMDLANAAQRRLSAGCQEGTTLDRTRTSVTAGLRKKLKDIMLDFQALRQRMMSEYKDTVERRYYTLTGEVPEDEVIERIISEGRGEEIMSAAVAEHGKGAVLAALNEIQDRHDAAREVERSLLELHQVFLDMAVVVQSQGDKLQNIEHHVSNARDYVHSGNKELGKAREHQRGSRKCLCIGIILLLLLILIVIVPIATSLRRS*	316	34997	6.53
TraesCS4B02G067100	TaSYP112-4B1	Qa	492	MLDFQALRQRMMSEYKDTVERRYYTLTGEVPEDEVIERIISEGRGEEIMSAAVAEHGKGAVLAALNEIQDRHDAAGEVERSLLELHQVFLDMAVVVQSQGEKIDDIENHVINARDYVHSGNKELGKAREHQRGSRKCLCISIILLLLLILIIIIPITTSLKRS*	163	18435.2	5.39
TraesCS4B02G067200	TaSYP112-4B2	Qa	945	MNDLMTKSFMSYVDLKKAAMKDLEAGGDETELTQAGGGGATDERLKGFFKEAEAVREEMAAIRDALARLHAANEEGKSLHQPDALRAMRVRVNADIVAVLGRARGIQRALADMDAANAAQRRLSAGCQEGTTLDRTRTSVTAGLRKKLKDIMNDFQALRQRMMSEYKDTVERRYYTLTGEVPEDEVIERIISEGRGEEIMSAAVAEHGKGAVLAALNEIQDRHDAAREVERSLLELHQVFVDMAVVVESQGEKINDIAHHVSNARDYVHSGNKELGKAREHQRGSRKCLCIGIILLLLLILIVIVPIATSLKRS*	314	34671.6	6.34
TraesCS4D02G066100	TaSYP112-4D	Qa	951	MNDLMTKSFMSYVDLKKAAMKDLEAGGDETETELTQACGGGATDERLKGFFREAEAVREEMAAIRDALARLHAANEEGKSLHQPDALRAMRVRVNADIVSVLGRARGIQRALADMDAANAAQRRLSAGCQEGTTLDRTRTSVTAGLRKKLKDIMLDFQALRQRMMSEYKDTVERRYYTLTGEVPEDEVIERIISEGRGEEIMSAAVAEHGKGAVLAALNEIQDRHDAAREVERSLLELHQVFLDMAVVVESQGEKINDIEHHVINARDYVHSGNKELGKAREHQRGSRKCLCIGIILLLLLILIVIVPIATSLRRS*	316	35117.2	6.05
TraesCS5A02G425600	TaSYP121-5A	Qa	954	MNNLFSSSWKRAGAGGDGGDLESGGVEMTAPPGAAAGASLDRFFEDVESIKDDLRELERIQRSLHDANESGKSLHDASAVRALRSRMDADVAAAIKKAKVVKLRLESLDRANAANRSVAGCGPGSSTDRTRTSVVAGLRKKLRDAMEAFSSLRSRITSEYRDTVARRYFTVTGAQPDEATLDTLADTGEGERFLQRAIAEQQGRGEVLGVVAEIQERHGAVADLERSLLELQQVFNDMAVLVAAQGEQLDDIEGHVGRARSFVDRGREQLQVARKHQKSSRKWTCIGIGILLVIILIIVIPIVLTNTNKSSNNNNQQ*	317	34420.7	6.99
TraesCS5B02G427600	TaSYP121-5B	Qa	963	MNNLFSSSWKRAGAGGDGGDLESGGGGGVEMTAPPGAAAGASLDRFFEDVESIKDDLRELERIQRSLHDGNESGKSLHDASAVRALRSRMDADVAAAIKKAKVVKLRLESLDRANAANRSVAGCGPGSSTDRTRTSVVAGLRKKLRDAMESFSSLRSRITSEYRDTVARRYFTVTGAQPDEATLDTLAETGEGERFLQRAIAEQQGRGEVLGVVAEIQERHGAVADLERSLLELQQVFNDMAVLVAAQGEQLDDIEGHVGRARSFVDRGREQLQVARKHQKSSRKWTCIGIGILLVVILIIVIPIVLKNTNKSNNNNNQQ*	320	34647.9	7.8
TraesCSU02G076400	TaSYP121-5U	Qa	966	MNNLFSSSWKRAGAGGDGGDLESGGGGGGVEMTAPPGAAAGASLDRFFEDVESIKDDLRELERIQRSLHDGNESGKSLHDASAVRALRSRMDADVAAAIKKAKVVKLRLESLDRANAANRSVAGCGPGSSTDRTRTSVVAGLRKKLRDAMESFSSLRSRITSEYRDTVARRYFTVTGSQPDEATLDTLAETGEGERFLQRAIAEQQGRGEVLGVVAEIQERHGAVADLERSLLELQQVFNDMAVLVAAQGEQLDDIEGHVGRARSFVDRGREQLQVARKHQKSSRKWTCIGIGILLVVILIIVIPIVLKNTNKSNNNNGQQ*	321	34663.9	7.8
TraesCS6A02G182200	TaSYP122-6A	Qa	1137	MAPGFTKFDVEKFDGTDNFGLWQTRVKDILTQQGILKGLQETKPTKVDNNAWEDMQVQAAATIRLCLADQMNDLFSSSSFKKYADLKDQVALDEMEAGSGSESANLDKFFEDVEGVKEDISGLESMHRRLQSVNEESKTAHDARAVKSLRARMDGDVVQVLRRAKVVKAKLEALDRANAASRKLPGCGAGSSTDRTRSSVVSGLGNKLKDLMDDFQGLRTRMAAEYKETVARRYYTVTGETAEESTIEALIASGESETFLQKAIQRDQGRGQVMATVSEIQERHDAVKDIERSLLELHQVFLDMAALVEAQAHQLNNIETHVARASSFVIRGTVELESARVYQKSSRKWACIAVVAGAVLVLVIVLPILVNLKLLSGR*	378	41726.4	5.99
TraesCS6B02G211000	TaSYP122-6B	Qa	918	MNDLFSSSSFKKYADLKDQVALDEMEAGGGANLDMFFEDVEGVKEDIRGLEAMHRRLQSVNEESKTAHDARAVKSLRARMDGDVVQVLRRAKVVKAKLEALDCANAASRKLPGCGAGSSTDRTRSSVVSGLGNKLKDLMDDFQGLRTRMAAEYKETVARRYYTVTGETAEESTIDALISSGESETFLQKAIQRDQGRGQVMATVSEIQERHDAVKDIERSLLELHQVFLDMAALVEAQGHQLNNIETHVARASSFVIRGTVELESARVYQKSSRKWACIAVVAGAVLVLVIVLPILVNLKLLSGR*	305	33515.2	6.35
TraesCS6D02G169800	TaSYP122-6D	Qa	918	MNDLFSSSSFKKYADLKDQVALDEMEAGGGANLDMFFEDVEGVKEDIRSLEAMHRRLQSVNEESKTAHDARAVKSLRARMDGDVEQVLRRAKVVKAKLEALDRANAASRKLPGCGAGSSTDRTRSSVVSGLGNKLKDLMDDFQGLRTRMAAEYKETVARRYYTVTGETAEESTIDALISSGESETFLQKAIQRDQGRGQVMATVSEIQERHDAVKDIERSLLELHQVFLDMAALVEAQGHQLNNIETHVARASSFVIRGTVELDSARVYQKSSRKWACIAVVAGAVLVLVIVLPILVNLKLLSGR*	305	33614.2	6.35
TraesCS7A02G368400	TaSYP123-7A	Qa	921	MNDLFSSSSFKKYADANPETSAADMEAGGMNGANLDQFFSDVEAVKEDLKGFETLHKRLQSTNEETKTAHDARTIKALRSRMDGDVEQVLKRAKAVKAKLEALKSDNANSRKAPDWGPGSSVDRTRTSVVAGLGKKLKDIMDDFQGLRAKMAAEYKETVARRYFTVTGEHAEESTIDSLISSGESESFLQKAIQDQGRGQVMDTISEIQERSDAVKDIERSLMDLHQVFQDMAALVEAQGHQLNDIESHVAHASSFVRRGTVELEQAHEIQKDTRKWMCFAVLGGIALVVVLVTPVLINLHILTLR*	306	33868.2	5.66
TraesCS7B02G260100	TaSYP123-7B	Qa	921	MNDLFSTNSFKKYADANPETSSADMEAGGMNGANLDQFFSDVEAVKEDLKGFETLHKRLQSTNEETKTAHDARTIKALRSRMDGDVEQVLKRAKAVKAKLEALERDNANSRKAPDWGPGSSVDRTRTSVVAGLGKKLKDIMDDFQGLRAKMAAEYKETVARRYFTVTGEHAEESTIDSLISSGESESFLQKAIQDQGRGQVMDTISEIQERHDAVKDIERSLMDLHQVFLDMAALVEAQGHQLNDIESHVAHASSFVRRGTVELEQAHEIQKDTRKWMCFAVIGGIALVVVVVTPVLINLHILTLR*	306	34016.3	5.63
TraesCS7D02G354500	TaSYP123-7D	Qa	921	MNDLFSTNSFKKYADANPETSAADMEAGGMNGANLDQFFSDVEAVKEDLKGFETLHKRLQSTNEETKTAHDARTIKALRSRMDGDVEQVLKRAKAVKAKLEVLKRDNANSRKAPDWGPGSSVDRTRTSVVAGLGKKLKDIMDDFQGLRAKMAAEYKETVARRYFTVTGEHAEESTIDSLISSGESESFLQKAIQDQGRGQVMDTISEIQERSDAVKDIERSLMDLHQVFLDMAALVEAQGHQINDIERHVAHASSFVRRGTVELEQAHEIQKDTRKWMCFAVLGGIALVVVLVTPVLINLHILTLR*	306	34060.5	5.9
TraesCS1A02G088800	TaSYP131-1A	Qa	864	MDAGVKLPRTTSQQHVPLGHATTVSPVNPVAHERDECDHEFMSTYWQWRRRRRAQHKVDHPCVGVVNGEELTTGMQRLRSGLLRGHGAMARVIHNARVNECVVLDLYSFSTLIRGCGQVIWSVHGRCSMVMRESIGQEYREVVERRVFTVTGNRLDEETGRSEQIFKDAVQKQGRAQILDTVVEIQERHDAVRDLERKLLELQKIFLDMAVLVEAQGDMISHIETHGSVSTQQVKTQFVMPPPPVVTTRSLHLVYPEPLIVVAVLSISACHDIVAGLLQPCQQQSQA*	287	32376.1	6.92
TraesCS2A02G219200	TaSYP132-2A	Qa	912	MNNLLTDSFEMDAKPPKERDIEMGRQNSKDKSDYGLEDFFKEVKEIEMLLDKMSNIVQKLQEANEESKSATKASAMKAIKGRMEKDIDEVGKIARSIKVKLEQMDRNNLANRKKPGCGKGTSVDRSRMSMTITLKKRLKERMNDFQNLRQTIQQEYREVVERRFFTVTGTKPSDEVIDNLIETGSSEQIFEKAIQGIGRGQIMATVEEIQERHDVVVDIEKKLLELQQIFADMAALVDAQGEILDNIESQVQNAVNHVQTGTEALRSAKSLQKKSRKCMMIAIIMLLIIAVIIVLSVLKPWAK*	303	34478.9	8.33
TraesCS2B02G244700	TaSYP132-2B	Qa	912	MNNLLTDSFEMDEKPPKERDIEMGRQNSKNKSDYGLEDFFKEVKEIEMLLDKMSNIVQKLQEANEESKSVTKASAMKAIKGRMEKDIDEVGKIARSIKVKLEQMDRNNLANRKKPGCGKGTSVDRSRMSMTIALKKRLKERMNDFQNLRQTIQQEYREVVERRFFTVTGTKPSDEVIDNLIETGSSEQIFEKAIQGIGRGQIMATVEEIQERHDVVVDIEKKLLELQQIFADMAALVDAQGEILDNIESQVQNAVNHVQTGTEALRSAKSLQKKSRKCMMIAIILLLIIAVIIVLSVLKPWAK*	303	34516	8.33
TraesCS2D02G224100	TaSYP132-2D	Qa	912	MNNLLTDSFEMDAKPPKERDIEMGRQNSKDKSDYGLEDFFKEVKEIEMLLDKMSNIVQKLQEANEESKSVTKASAMKAIKGRMEKDIDEVGKIARSIKVKLERMDRNNLANRKKPGCGKGTSVDRSRMSMTIALKKRLKERMNDFQNLRQTIQQEYREVVERRFFTVTGTKPSDEVIDNLIETGSSEQIFEKAIQGIGRGQIMATVEEIQERHDVVVDIEKKLLELQQIFADMAALVDAQGEILDNIESQVQNAVNHVQTGTEALRSAKSLQKKSRKCMMIAIIMLLIIAVIIVLSVLKPWAK*	303	34505	8.64
TraesCS2B02G238200	TaSYP133-2B	Qa	918	MSDLPPAPAMGGERDIELGLPTTNTTSGYTLQHILEDIRQFSTLLGSTPKMLHKLKEANKELKSAAESAAVKEIKGRMEKDMDEAVKMARIMKEKLSRIFQGVLVPVLNNMSTGHAYPGLTVPVTLDPSTLSMITALKIKLKERKKDLKNLGKAMQEEYIEVVQSRIFTVTGVKLSDKVIRVIDTNSITQMFEHRVHGIGPEQAGAIGEEIKERRGAAMDLGKKAVEVRKNFREMLALVKAQEKIVKALSQSAAVRARSIAEELARARSRAEELRQKMEETKLLIVLFVIFLLLFIVAVTLGISG*	305	33787.8	9.59
TraesCS2D02G219400	TaSYP133-2D	Qa	1044	MSDLPPAAAMGGERDIELGLPTTNTTSGYTLQHILEDIRQFSTLLGSTPTMLHKLEVRETLMPILCSPGHNVFVFHEKIGLFPRTYFAQFALLSPHLQEANKELKSAAESAAVKEIKGRMEKDMDEAVKMARIMKEKLIRIFQGVLVPVLNNMSTGHAYPGLTVPMTLDPSTLSIITALKIKLKERKKDLENLGKAMQEEYIEVVQSRIFTVTGVKLSDEVIRVIDTSSIMQMFEHRVHGIGPEQASAIGEEIKERRAAAMDLGKKNAEVQKNFREMLALVKAQEKIVKALSQSAEARARSAAEELARARSRVQELREEMEETKLLIALVVILFLLCIVAVTLGISG*	347	38546.1	7.12
TraesCS2A02G246600	TaSYP134-2A	Qa	1002	MMKVVQLVCQIEFITIKPSCRCCSTCITYSINIPILQDSFELPRRDSSRDGDVEMGMHQPDASDNLKGFLKKVDGIESLIAKLTNLLTKLQTANEESKAVTKASAMKAIKQRMEKDIDEVGKIARMAKTKVDELEKDNLSNRQKPGCGKGSAVDRSREQTTGAVKKKLKERMDDFQVLRESIRQEYREVVERRVFTVTGNRPDEETIDDLIETGRSEQIFKDAVQQQGRGQILDTVAEIQERHDAVRDLERKLLELQQIFLDMAVLVEAQGDMINHIETHVSNATNHIQQGVGALQNAKKLQKNSRKWMCYAIILLLVIVVIIVVAVIQPWKK*	333	37774.7	8.36
TraesCS2B02G263700	TaSYP134-2B	Qa	909	MNNLLTDSFELPRRDSSRDGDVEMGMHQPDASDNLKGFLKKVDGIESLIAKLTNLLTKLQTANEESKAVTKASAMKAIKQRMEKDIDEVGKIARMAKTKVDELEKDNLSNRQKPGCGKGSAVDRSREQTTGAVKKKLKERMDDFQVLRESIRQEYREVVERRVFTVTGNRPDEETIDDLIETGRSEQIFKDAVQQQGRGQILDTVAEIQERHDAVRDLERKLLELQQIFLDMAVLVEAQGDMINHIETHVSNATNHIQQGVGALQNAKKLQKNSRKWMCYAIILLLVIVVIIVVAVIQPWKK*	302	34258.3	7.73
TraesCS2D02G248900	TaSYP134-2D	Qa	909	MNNLLTDSFELPRRDSSRDGDVEMGMHQPDASDNLKGFLKKVDGIESLIAKLTNLLTKLQTANEESKAVTKASAMKAIKQRMEKDIDEVGKIARMAKTKVDELEKDNLSNRQKPGCGKGSAVDRSREQTTGAVKKKLKERMDDFQVLRESIRQEYREVVERRVFTVTGNRPDEETIDDLIETGRSEQIFKDAVQQQGRGQILDTVAEIQERHDAVRDLERKLLELQQIFLDMAVLVEAQGDMINHIETHVSNATNHIQQGVGALQNAKKLQKNSRKWMCYAIILLLVIVVIIVVAVIQPWKK*	302	34258.3	7.73
TraesCS5A02G240200	TaSYP135-5A	Qa	459	MLSLNLAHVCLLFFPSCICLWFAACPCAVLQNLPNMQKPGCGKGSAVDRSREQTIGAVKKKMKEQMDDFQVMRESIGQEYREVVERRVFTVTGNRLDEETIDGLIETGRSEQIFKDAVQQQGRAQFHVFTVYEGYHCTFPSGEELKYGGGAS*	152	17078.5	5.93
TraesCS5B02G034800	TaSYP136-5B1	Qa	912	MNNLLTDSFELLRRDSSRDEGDVEMGIHQLDASDNLKGFLNKVNGIKSLIAKLTSLLTKLQTANEESKVVTKASAMKAIKKQMEKDIDAVMKIARMAKTKIDELEKDNLSNTEKPGCGKGSVVDQLREQTTGAVKKKLKKRMDDFQVLRESIRQEYREVVERRVFTVTGNRPDEQTIDDLIETGRSEHIFKDAVQQQGRGQILDTLAEIQERHDAVRDLERKLLELQQIFLDMAVLVDAQGDMTDDIVTHVSKASDYIQQSLDALQKAKKLQKNSRMCMCSAIIVLLLIVVIVVLVVIKPGKK*	303	34190.6	8.26
TraesCS5B02G035600	TaSYP136-5B2	Qa	930	MNNLLTDSFELPPWDSSRDWGDVEMGMHQPGASDNLKGFFKKVHGIKSLIAKLTSLLTKLQTANEESKAVTKASAMKAIKKQMEKDIDAVMKIARMAKTKIDELEKDNLSNTEKPGCGKGSAVDQLREQTTGAVKKKLKKRMDDFQVLRESIRQEYREVVERRVFIVTGNRPDEQTIDDLIETGRSKQIFKDAVQQQGRGRILDTVAEIQERHDAVRDLERKLVELQQIVLDTAVLVDAQGDMTDDIAKHVSKATNYVQEGVEALQKAKKLQKNSRMCMCSAIIVLLLILVIVVLVVIKPGKKKLLSTT*	309	34712.3	9.2
TraesCS5A02G096800	TaSYP137-5A	Qa	921	MRNLLSNSFELNKEERPPGNVDIELGLQGDLSGSAQPGFDGFYEQVREINKLLETLTKLLKDLQNSNEESKVVTKASAMKDIKRRMEKDVNEVTKVARLTKSKLQQLNKENLANREKPDFHKGSGVDRSRTSVTITLTTRLRERISEFQTLREAIQTEYREVVERRVFTVTGERADEETIDKLIETGDSEQIFQRAIQEQGRGRVLDTLQEIQERHDTVKEIETKLLELQQIFLDLSVLVEAQGEILNNIEVQVTGAVEHVQTGTNLLQKARVLQKNTRKWTCIAIIILLIIVLVIVLSLKPWAKK*	306	35027.1	6.42
TraesCS5B02G102700	TaSYP137-5B	Qa	921	MRNLLSNSFELNKEERPPGNVDIELGLQGDVSGSAQPGFDGFYEQVMEIEKLLETLTKLLKDLQNSNEESKVVTKASAMKDIKRRMEKDVNEVTKVARLTKSKLQQLNKENLANREKPGFHKGSSVDRSRTSVTITLTTRLRERISEFQTLREAIQTEYREVVERRVFTVTGERADEETIDKLIETGDSEQIFQRAIQEQGRGRVLDTLQEIQERHDTVKEIETKLLELQQIFLDLSVLVEAQGEILNNIEAQVTGAVEHVQTGTNLLQKARVLQKNTRKWTCIAIIILLIIVLVIVLSLRPWEKK*	306	35033.1	5.9
TraesCS5D02G109500	TaSYP137-5D	Qa	921	MRNLLSNSFELNKEERPPGNVDIELGLQGDLSGSAQPGFDGFYEQVREIDKLLETLTKLLKDLQNSNEESKIVTKASAMKDIKRRMEKDVNEVTKVARLTKSKLQQLNKENLANREKPVFHKGSSVDRSRTSVTITLTMRLRERISEFQTLREAIQTEYREVVERRVFTVTGERADEETIDKLIETGDSEQIFQRAIQEQGRGRVLDTLQEIQERHDMVKEIETKLLELQQIFLDLSVLVEAQGEILNNIEVQVTGAVEHVQTGTNLLQKARVLQKNTRKWTCIAIIILLIIVLVIVLSLKPWAKK*	306	35116.4	6.42
TraesCS7A02G481800	TaSYP138-7A	Qa	915	MNNLLTDSFELPRRDSSRDGGDLEMGIHQPDASDNLQAFLKKVDAIDSLIAKLTSLFTKLQSANEESKAVTKASAMKAIKQRMEKDIDEVGKIARMAKTKLDELDKDNLSNRKKPGCEEDSAVDRSREQTTGAVKKKLKKRMDDFQVLRESIRQEYREVVERRVFTVTGNRPDEETIDDLIDTGRSEQIFKDAVQQQGRGQILDTVAEIQERHDAVRDLERKLLELQQIFLDMAVLVEAQGDMINHIETHVANATNHIQQGVGALQKAKTLQKNSRKWMCYAILLLLVVVAIVVLGVIQPWKKK*	304	34477.5	6.99
TraesCS7B02G394300	TaSYP138-7B	Qa	915	MNNLLTDSFELPRRDSSRDGGDLEMGMHKPDASDNLQAFLKKVDGIDSLIAKLTSLLTKLQSANEESKAVTKASAMKAIKHRMEKDIDEVGKIARMAKTKLDELDKDNLSNRKKPGCEEDSAVDRSREQTTGAVKKKLKKRMDDFQVLRESIRQEYREVVERRVFTVTGNRPDEETIDDLIETGRSEQIFKDAVQQQGRGQVLDTVAEIQERHDAVRDLERKLLELQQIFLDMAVLVEAQGDMINHIETHVSNATNHIQQGVGALQKAKTLQKNSRKWMCYAIILLLVVVAIVVLGVIQPWKKK*	304	34472.5	7.73
TraesCS3A02G175000	TaSYP21-3A	Qa	834	MSFQDLEAGNGVRGTPRRNGRAAGAGAGSSQAVASGVFQINTAVATFQRLVNTLGTPKDTPDLRDRIHKTRAHITQLVKDTSEKLKQASEADHRLEATPTKKIADAKLAKDFQAVLKEFQKAQRLAVEREAAYAPFITQTGLPQSYNSTEMNNGADKLAEQRTQLLESRRQELVFLDNEIVFNEAIIEERDQGIQEIQHQITEVNEIFKDLAVLVHDQGAMIDDIDTHIDNSVAATAQAKGQLSKAAKTQKSNSSLICLLMVIFGVVLLIVIIVLAA*	277	30299.4	6.1
TraesCS3D02G180500	TaSYP21-3D	Qa	834	MSFQDLEAGNGVRGTPRRNGRAAGAGAGSSQAVASGVFQINTAVATFQRLVNTLGTPKDTPDLRDRIHKTRAHITQLVKDTSEKLKQASEADHRLEATPTKKIADAKLAKDFQAVLKEFQKAQRLAVEREAAYAPFITQAGLPQSYNSTEMNNGADKLAEQRTQLLESRRQELVFLDNEIVFNEAIIEERDQGIQEIQHQITEVNEIFKDLAVLVHDQGAMIDDIDTHIDNSVAATSQAKGQLSKAAKTQKSNSSLICLLMVIFGVVLLIVIIVLAA*	277	30285.4	6.1
TraesCS6A02G271000	TaSYP22-6A	Qa	810	MSFADLESGALQAPRRGRGADATRALVFQITTAVSSYRRLLNSLGTPKDTPALRDQLQKTSHKVLQLAKDAKEKLTSAAEADKSTGTSADKRVADMKLAKDFAATMEEFRKLQNLAIQREMAYKPVVPQGAQPSYTMNDGRSDFDKMPEQRALLAEPNRLEVLQLDNEIVFNEAIIEERDQAIQDIQQQIGEVHEAFKDLATLVHAQGGVIEEVDSNIENSAAATSEAKKELGKASKTQKSNSSLFWHLETRMLRSLLVHPEEPYYVQD*	269	29928.7	5.53
TraesCS6B02G298100	TaSYP22-6B	Qa	801	MSFADLESGALQAPRRGRGADATRALVFQITTAVSSYRRLLNSLGTPKDTPALRDQLQKTSHKVLQLAKDAKEKLTSAAEADKSTGTSADKRVADMKLAKDFAATMEEFRKLQNLAIQREMAYKPVVPQSAQPSYTTNDGRSDFDKMPEQRALLAEPNRLEVLQLDNEIVFNEAIIEERDQAIQDIQQQIGEVHEAFKDLATLVHAQGGIIEEVDSNIENSAAATSEAKKEIGKASKTQKSNSSLLCLLMVIFGVVLLIVIIVLAS*	266	29125.2	5.58
TraesCS6D02G244100	TaSYP22-6D	Qa	801	MSFADLESGALQAPRRGRGADATRALVFQITTAVSSYRRLLNSLGTPKDTPALRDQLQKTSHKVLQLAKDAKEKLTSAAEADKSTGTSADKRVADMKLAKDFAATMEEFRKLQNLAIQREMAYKPVVPQGAQPSYTMNDGRSDFDKMPEQRALLAEPNRLEVLQLDNEIVFNEAIIEERDQAIQDIQQQIGEVHEAFKDLATLVHSQGGIIEEVDSNIENSAAATSEAKKEIGKASKTQKSNSSLLCLLMVIFGVVLLIVIIVLAS*	266	29141.2	5.58
TraesCS7A02G181800	TaSYP23-7A	Qa	789	MSFEDLEAGVVRPAPLPLAQVVAHGVFQINTKVVALRHLGDALGTPKDTPALRVRLRSTRAEAAWLARITSYNLKQAAAAGDGGTDGSTSPCSKLAMDFEAALSELQKVQQRIVAAERQVTSCAAAATSAGGTFAGHEQCTGQTQQQLQQQLLSHGTEVEELEAVVDERERGIRETEQVITEINEIFRDLYALVDEQACSVDHVVCDIETAAATTGQAEEEVSALAVEADRVSSSSSSSSTKYLLMFVVGIFLFIFLLVLVG*	262	27993.5	4.72
TraesCS3A02G119100	TaSYP3-3A	Qa	1032	MNPSRSAPASFRDRTNEFRSAVESARRHVAPSPAAASASGSAGPLDDSRSAASAHSEFNRRASKIGLGIHQTSQKLARLAKLAKKTSVFDDPTLEIQELTAVVKKDIGALNNAVMDLQVLCNSQNESGNLSKDTTNHSTTVVDNLKNRLMSATKEFKEVLTMRTENLKVHENRRQMFSSSAAKDASNPFIRQRPLVPREASDTAPPAPWASDSATTPLFQRKKTNGDHGASSSSSSSPAFMQQQQLAVQQDSYMQSRAEALQNVESTIHELSNIFTQLATMVSQQGELAIRIDENMEETVANVEGAQGQLLKYLNSISSNRWLMMKIFFVLMVFLMIFIFFVA*	343	37713.5	9.16
TraesCS3B02G138100	TaSYP3-3B	Qa	1029	MNPSRSAPASFRDRTNEFRSAVESARRHVAPSPAAASASGSAGPLDDSRSAASAHSEFNRRASKIGLGIHQTSQKLARLAKLAKKTSVFDDPTLEIQELTAVVKKDIGALNNAVMDLQVLCNSQNESGNLSKDTTNHSTTVVDNLKNRLMSATKEFKEVLTMRTENLKVHENRRQMFSSSAAKDASNPFIRQRPLVPREASDAAPPAPWASDSATTPLFQRKKTNGDHGASSSLSSPAFMQQQQLAVQQDSYMQSRAEALQNVESTIHELSNIFTQLATMVSQQGELAIRIDENMEETVANVEGAQGQLLKYLNSISSNRWLMMKIFFVLMVFLMIFIFFVA*	342	37622.5	9.16
TraesCS3D02G121000	TaSYP3-3D	Qa	1023	MNLSRSAPASFRDRTNEFRSAVESARRHVALSPAAASASGSAGPLDDSRSVASAHSEFNRRASKIGLGIHQTSQKLARLAKLAKKTSVFDDPTLEIQELTAVVKKDIGALNNAVMDLQVLCNSQNESGNLSKDTTNHSTTVVDNLKNRLMSATKEFKEVLTMRTEVHENRRQMFSSSAAKDASNPFIRQRPLVPREASDAAPPAPWASDSATTPLFQRKKTNGDHGASSSSSSSPAFMQQQQLAVQQDSYMQSRAEALQNVESTIHELSNIFTQLATMVSQQGELAIRIDENMEETVANVEGAQGQLLKYLNSISSNRWLMMKIFFVLMVFLMIFIFFVA*	340	37388.2	8.96
TraesCS4A02G435000	TaSYP4-4A	Qa	849	MATRNRTPLFRKYRDALRHVXXXXXXXXXXXXXXXXXXXXXXXXXXXXXXXXXXXXXXXXXXXXXXCSRGAAMVGLPPAWVDVSEEISANMQRAKTKMAELAKAHAKALMPSFGDGRDDQRAIEVLTHEITDLLKRSEKKLQKLSMKDSSEDSNVRKNVQRSLATDLQTLSMEFRKKQSTYLKQLRQQKEGQDGVDLEMNINGSKSTFELEDDEFEDVGFTEVQMSKLKKSEAFTREREREIEQVAQSVNELAQIMKDLSVLVIDQGTIVDRIDYNVQNVAASVEEGYKQLQKAERTQKKGGMVMCATVLVILIFILIILLVLKKILF*	282	32101	8.68
TraesCS7A02G049200	TaSYP4-7A	Qa	987	MATRNRTPLFRKYRDALRHVRAPAGAPSASSSSSSPGGGPAVVEMASLLRPDRNYAPLSTDDPSASSSRGAATVGLPPAWVDVSEEISANMQRAKTKMAELAKAHAKALMPSFGDGRDDQRAIEILTHEITDLLKRSEKKLQKLSMKDSSEDSNVRKNVQRSLATDLQTLSMEFRKKQSTYLKQLRQQKEGQDGVDLEMNMNGSKSTFELEDDEFEDVGFTEVQMSKLKKSEAFTREREREIEQVAQSVNELAQIMKDLSVLVIDQGTIVDRIDYNVQNVAASVEEGYKQLQKAERTQKKGGMVMCATVLVILIFILIILLVLKKILF*	328	36511.7	8.44
TraesCS7D02G044300	TaSYP4-7D	Qa	717	MQRAKTKMAELAKAHAKALMPSFGDGRDDQRAIEILTHEITDLLKRSEKKLQKLSMKDSSEDSNVRKNVQRSLATDLQTLSMEFRKKQSTYLKQLRQQKEGQDGVDLEMNMNGSKSTFELEDDEFEDVGFTEVQMSKLKKSEAFTREREREIEQVAQSVNELAQIMKDLSVLVIDQGTIVDRIDYNVQNVAASVEEGYKQLQKAERTQKKGGMVMCATVLVILIFILIILLVLKKILF*	238	27207.4	6.79
TraesCS2A02G372700	TaSYP8-2A	Qa	954	MSRVRDRTEDFKESVRVAALSHGYTESQLAALMSSFIIRKPSPKSPFTNAAIKTLESIRELEKFIVKHRRDYVDMHRTTEQERDNIEHEVGIFVKACKEQIDILKNRILEDERNRRANTWLGTRDETSRLDLIAHQHGVVLILSERLHSVTAQFDRLRSLRFQEAINRVMPRKKIKKKPEIKPTEPSKSNLVLKSDVSKVEDREVSTAPLRVQEQLLDDETRALQMELTNLLDTVQETETKMIEMSALNHLMSTHVLQQAQQIQYLYDQAVEATNNVERGNKELSQAIQRNNSSRTFLLLFFFVLTFSVLFLDWYKN*	317	37023.3	8.82
TraesCS2B02G389700	TaSYP8-2B	Qa	954	MSRVRDRTEDFKESVRVAALSHGYTESQLAALMSSFIIRKPSSKSPFTNAAIKTLESIRELEKFIVKHRRDYVDMHRTTEQERDNIEHEVGIFVKACKEQIDILKNRILEDERNRRANTWLGTRDETSRLDLIAHQHGVVLILSERLHSVTAQFDRLRSLRFQEAINRVMPRKKIKKKPEIKPTEPSKSNLVLKSDVSKVEDREVSTAPLRVQEQLLDDETRALQMELTNLLDTVQETETKMIEMSALNHLMSTHVLQQAQQIQYLYDQAVEATNNVERGNKELSQAIQRNSSSRTFLLLFFFVLTFSVLFLDWYKN*	317	36986.2	8.82
TraesCS2D02G368900	TaSYP8-2D	Qa	954	MSRVRDRTEDFKESVRVAALSHGYTESQLAALMSSFIIRKPSPKSPFTNAAIKTLESIRELEKFIVKHRRDYVDMHRTTEQERDNIEHEVGIFVKACKEQIDILKNRILEDERNRRANTWLGTRDETSRLDLIAHQHGVVLILSERLHSVTAQFDRLRSLRFQEAINRVMPRKKIKKKPDIKPTEPSKSNLVLKSDVSKVEDREVSTAPLRVQEQLLDDETRALQMELTNLLDTVQETETKMIEMSALNHLMSTHVLQQAQQIQYLYDQAVEATNNVERGNKELSQAIQRNSSSRTFLLLFFFVLTFSVLFLDWYKN*	317	36982.2	8.82
TraesCS5A02G226000	TaGOS11-5A	Qb	654	MEASSWDALRKQARRLEAQLDDQMIAYRKLVSMKSDGSENDIETDIERSLKQLQQVNSQMQTWVSSGGSEVLSHTLTRHMEILQDLTQEFYRLRSSLRVKQQHASLLDLRDFDRAKFDVEESGDSEQALLREQAAISRNSGQVDTVISQAQATLGALMSQRSTFGGITTKISNVSSRIPTINHILASIRRKKSMDTIILSLVASVCAFLMFIYWLSK*	217	24557.9	7.88
TraesCS5B02G224500	TaGOS11-5B	Qb	654	MEASSWDALRKQARRLEAQLDDQMIAYRKLVSMKSDGSENDIETDIERSLKQLQQVNSQMQTWVSSGGSEVLSHTLTRHMEILQDLTQEFYRLRSSLRVKQQHASLLDLRDFDRAKFDVEESGDSEQALLREQAAINRNSGQVDTVISQAQATLGALMSQRSTFGGITTKISNVSSRIPTINHILASIRRKKSMDTIILSLVASVCAFLMFIYWLSK*	217	24584.9	7.88
TraesCS6A02G088900	TaGOS12-6A	Qb	720	MHGVGQSDDAAAAAALELQESGWEELRREARKLEGDLDVKLSSYARLAARSSSASASASAASPTADRSSWKSTELEIQALLDKLQDVNDAMSRCAAXXXXXXXXXXKLARHRDILHEFTQEFRRTRGNLSSMREHADLLSSVRGDITESKATGGMSPRVHLLRERASIHGSVNQIDEVIGQAQSTRAALSNQRALFGDVQGKVKQLGEKFPVVRGLLGAIKRKKSKDTIILSAVIAACTIFLIIYWLSK*	239	26053.6	9.44
TraesCS6B02G111300	TaGOS12-6B	Qb	759	MHGVGPSDDAAAAAALELQESGWEELRREARKLEGDLDVKLSSYARLAARSSSASASASASAASPTADRSSWKSTELEIQALLDKLQDVNDAMSRCAAPAAPATASVSQKLARHRDILHEFTQEFRRTRGNLSSMREHADLLSSVRGDITESKATGGMSPRVHLLRERASIHGSVNQIDEVIGQAQSTRAALSNQRALFGDVQGKVKQLGEKFPVVRGLLGAIKRKKSKDTIILSAVIAACTIFLIIYWLSK*	252	27161.8	9.44
TraesCSU02G017400	TaGOS12-U	Qb	762	MMHGVGPSDDAAAAAALELQESGWEELRREARKLEGDLDVKLSSYARLAARSSSASASASASAASPTADRSSWKSTELEIQALLDKLQDVNDAMSRCAAPAAPATASVSQKLARHRDILHEFTQEFRRTRGNLSSMREHADLLSSVRGDITESKATGGMSPRVHLLRERASIHGSVNQIDEVIGQAQSTRAALSNQRALFGDVQGKVKQLGEKFPVVRGLLGAIKRKKSKDTIILSAVIAACTIFLIIYWLSK*	253	27293	9.44
TraesCS4A02G299300	TaMEMB-4A	Qb	717	MDFSGGGGGATLSEMYQSARRLLLSARDGVARVERLASAPASSSYSASAPLVGAPDPAGAEAVRREVAQIQGLCAQMDRLWRSIPAKGQRDLWKRKVEQLSEEVDSLKETLDKHSLRQRKRILEAKERAELFERANGESSHVLQIFDDEAQAMQSARSSSRMLDEAFETGVAILHKYSDQRDRLKSAQRKALDVLNTVGLSNSVLKLIEKRHRVDKRIAYGGMIITVVLMVAFWRWTH*	238	26577.3	9.63
TraesCS4B02G014100	TaMEMB-4B	Qb	717	MDFSGGAGGATLSEMYQSARRLLLSARDGVARVERLASAPASSSYSASAPLVGAPDPAGAEAVRREVAQIQGLCAQMDRLWRSIPAKGQRDLWKRKVEQLSEEVESLKETLDKHSLRQRKRILEAKERAELFERANGESSHVLQIFDDEAQAMQSARSSSRMLDEAFETGVAILHKYSDQRDRLKSAQRKALDVLNTVGLSNSVLKLIEKRHRVDKRIAYGGMIITVVLMVAFWRWTH*	238	26605.3	9.63
TraesCS4D02G012300	TaMEMB-4D	Qb	726	MDFSGGAGGGGGATLSEMYQSARRLLLSARDGVARVERLASAPASSSYSASAPLVGAPDPAGAEAVRREVAQIQGLCAQMDRLWRSIPAKGQRDLWKRKVEQLSEEVDSLKETLDKHSLRQRKRILEAKERAELFERANGESSHVLQIFDDEAQAMQSARSSSRMLDEAFETGVAILHKYSDQRDRLKSAQRKALDVLNTVGLSNSVLKLIEKRHRVDKRIAYGGMIITVVLMVAFWRWTH*	241	26762.5	9.63
TraesCS7A02G385500	TaNPSN11-7A	Qb	786	MDLASVNEELAEIDGQIADIFRALQNGFQKLDKIKDANRRSRQLEELTDKMRDCKRLIKDFERVVKDEAGSVDPNTAKFLNERKQSLIKELNSYVALKKQHASENKRVDLFDAPSGEDAFGEENVLLASNMSNQQLMQHGDNLMDETDQALARSKQTVQETINVGTETAAALKAQTEQMSRVVNELDSIHFSMKKASKLVKEIGRQVATDRCIMGLLFLIVAGVIAVIIVKIVNPHNKDIPDLPGLAPPVGRRLLSIAEGK*	261	29049.3	5.92
TraesCS7B02G288400	TaNPSN11-7B	Qb	789	MDLASVNEELAEIDGQIADIFRALQNGFQKLDKIKDANRRSRQLEELTDKMRDCKRLIKDFERVVKDEAGSVDPNTSKFLNERKQSLIKELNSYVALKKQHASENKRVDLFDAPSGEDAFGEENVLLASNMTNQQLMQHGDNLMDETDQALARSKQTVQETINVGTETAAALKAQTEQMSRVVNELDSIHFSMKKASKLVKEIGRQVATDRCIMGLLFLIVAGVIAVIIVKIVNPHNKDIPDLPGLAPPVSRRLLSIVENNG*	262	29237.4	5.72
TraesCS7D02G382100	TaNPSN11-7D	Qb	786	MDLASVNEELAEIDGQIADIFRALQNGFQKLDKIKDANRRSRQLEELTDKMRDCKRLIKDFERVVKDEAGSVDPNTAKFLNERKQSLIKELNSYVALKKQHASDNKRVDLFDAPSGEDAFGEENVLLASNMSNQQLMQHGDNLMDETDQALARSKQTVQETINVGTETAAALKAQTEQMSRVVNELDSIHFSMKKASKLVKEIGRQVATDRCIMGLLFLIVAGVIAVIIVKIVNPHNKDIPDLPGLAPPVSRRLLSIVENK*	261	29150.4	5.91
TraesCS4A02G162300	TaNPSN12-4A	Qb	822	MASDVPMTPELQQMDGEIQDIFRALQNGFQKMDKIKDSNRQAKQLEDLTGKMKECKRLIKEFDRILKVEESKNPPEVNKQLNDRKQYMIKELNSYVTLRKTYQSSLGNNKRVELFDMGGTSSEPAADDNIQMASAMTNQQLVDSGRNQMDQTDEAIARSKMVVAQTVEVGSQTATTLTQQTEQMKRIGNELDSVHFSLKKASQLVKEIGRQVATDKCIMGLLALIVFGVIAIIVVKIVNPHNKNIPDIPGMAPPAQNFQTNRRLLSAKAFRGL*	273	30643.2	9.08
TraesCS4B02G157900	TaNPSN12-4B	Qb	813	MQQCTSSLEVNLSLLDSGIQTPINGFQKMDKIKDSNRQAKQLEDLTGKMKECKRLIKEFDRILKDEESKNPPEVNKQLNDRKQYMIKELNSYVTLRKTYQSSLGNNKRVELFDMGATSSEPAAVDNIQMASAMTNQQLIDSGRNQMDQTDEAIARSKMVVAQTVEVGSQTATTLTQQTEQMKRIGNELDSVHFSLKKASQLVKEIGRQVATDKCIMGLLALIVFGVIAIIVVKMVNPHNKNIPDIPGMAPPAQNFQTNRRLLSAKAFRGL*	270	30202.8	9.25
TraesCS4D02G161700	TaNPSN12-4D	Qb	822	MASDVPMTPELEQIDGEIQDIFRALQNGFQKMDKIKDSNRQAKQLEDLTGKMKECKRLIKEFDRILKDEESKNPPEVNKQLNDRKQYMIKELNSYVTLRKTYQSSLGNNKRVELFDMGATSSEPAADDNIQMASAMTNQQLIDSGRNQMDQTDEAIARSKMVVAQTVEVGSQTATTLTQQTEQMKRIGNELDSVHFSLKKASQLVKEIGRQVATDKCIMGLLALIVFGVIAIIIVKIVNPHNKNIPDIPGMAPPAQNFQTNRRLLSAKAFRSL*	273	30714.3	8.72
TraesCS2A02G149700	TaNPSN13-2A	Qb	810	MAASDVPMSPELEQVDGEIQDIFRALHNGFQKIDKMKDSNRQSKQLEELTGKMRECKRLIKEFDRVLKDEEKSNTSEVNKQLNDKKQFMIKELNSYVTMRKTYQSSLGNKRIELFDAGNDQVAEDNVQMASEMSNQQLIDSGMKQMDQTDQAIERSKMVVAQTVDVGAQTATTLTQQTDQMKRIGNELDSVHFSLKKASQMVKEIGRQVATDKCIMGFLFLIVCGVIAIIVVKIVNPHNKSIPDIPGLAPPAPPAQNRKLLSVDPFRML*	269	30333.9	6.85
TraesCS2B02G174800	TaNPSN13-2B	Qb	810	MAASDVPMSPELEQIDGEIQDIFRALQNGFQKIDKIKDSNRQSKQLEELTGRMRECKRLIKEFDRVLKDEEKRNTSEVNKQLNDKKQFMIKELNSYVTMRKTYQSSLGNKRIELFDAGNDQVAEDNVQMASEMSNQQLIDSGMKQMDQTDQAIERSKMVVAQTVEVGAQTATTLTQQTDQMKRIGNELDSVHFSLKKASQMVKEIGRQVATDKCIMGFLFLIVCGVIAIIVVKIVNPHNKSIPDIPGLAPPAPPVQNRKLLSVDPFRML*	269	30460.1	7.65
TraesCS2D02G154800	TaNPSN13-2D	Qb	810	MAASDVPMSPELEQVDGEIQDIFRALHNGFQKIDKMKDSNRQSKQLEELTGKMRECKRLIKEFDRVLKDEEKRNTSEVNKQLNDKKQFMIKELNSYVTMRKTYQSSLGNKRIELFDAGNDQVAEDNVQMASEMSNQQLIDSGMKQMDQTDQAIERSKMVVAQTVEVGAQTATTLTQQTDQMKRIGNELDSVHFSLKKASQMVKEIGRQVATDKCIMGFLFLIVCGVIAIIVVKIVNPHNKSIPDIPGLAPPAPPAQNRKLLSVDPFRML*	269	30417	7.66
TraesCS2B02G101900	TaSEC201-2B	Qb	711	MDEVTQAVENLKREWSRVVAQLEVCIAAIESCVKLGKGTEEASSLPRLNGSALDALQLLNALQCRLDLLAEQLPTFEEVQSVQATLGSWKEKYQRTKAGMTSAAESTTDSLRRSRQLMVQEVGRSANTLSTFDGLPSVLRKAEGEYQGHRSLLMRTRGLLSTMQRQDVLDRIILTTGFLVFSLAVLYVASRRIGLFTLQRKLADAIRSGSVSAGDILGKVQEGPAPTTNAPPNFHV*	236	25846.6	8.84
TraesCS3A02G132200	TaSEC202-3A	Qb	831	MDEVTQAVENLKSEWSQAVAQLEVCIAAIEFCGKMGKGTEEAMSLPRLNGSAQDALQLLNALQCRLDLLAEQLPTFEEVQSGQATLGSWKEQYQRLRATLRSANLQAKVNIGKAAQEERELLLGGGEESTIRRRNLQTKAGMTSAAESITESLRRSRQLMVQEVERSANTLSTFDESTSVLRKAEGEYQGHRSLLMRTRGMLSTMQLQDVLDRIILTIGFLVFSLAVLYVVSRRIGLLTLQRKLADAIRSGSVSAGNILAKVQEGPAPTNAPYDEL*	276	30384.7	6.07
TraesCSU02G049300	TaSEC202-U	Qb	870	MDEVTQAVENLKREWSQAVAQLEVCIAAIESCGKMGKGTEEAMSLPRLNGSAQDALQLLNALQCRLDLLAEQLPTFEEVQSGQATLGSWKEQYQRLRVSLRSANLQAKANIGKAAQEERELLLGGGEDSTIRRRNLQTKTGMTSAAESITESLRRSRQLMVQEVERSANTLSTFDESTSVLRKAEGEYQGHRSLLMRTRGLLSAMQRQDVLDRIILTVGFLIFSLAVLYVVSRRIGLLTLQRKLADAIRSGSVSAGDILGKVPQDGPAQQMLLPSMMNCDLLPSIVCCT*	289	31782.5	7.56
TraesCS6A02G248900	TaSEC203-6A	Qb	903	MDEVTQAVENLKSEWSQAVAQLEVCIAAIESCGKMGKGTEEAMSLPRLNGSAQDALQLLNALQCRLDLLAEQLPTFEEVQSGQATLGSWKEQYQRLRATLRSANLQAKVNIGKAAQEERELLLGGGEESTIRRRNLHPKHMSCLEECGYVNSVVLTGDAWRTKAGMTSAAESITESLRMSRQLMVQEVERSANTLSTFDESTSVLRKAEGEYQGHRSLLMRTRGMLSTMQRQDVLDRIILTIGFLVFSLAVLYVVSRRIGLLTLQRKLADAIRSGSVSAGDILAKVQEGPAPTNAPYDEL*	300	33029.7	5.82
TraesCS6B02G275900	TaSEC203-6B	Qb	837	MDEVTQAVENLKSEWSQAVAQLEVCIAAIESCGKMGKGTEEAMSLPRLNGSAQDALQLLNALQCRLDLLAEQLPTFEEVQSGQATLGSWKEQYQRLRAALRSANLQAKVNIGKAAQEERELLLGGGEESTVRRRNLQTKAGMTSAAESITESLRRSRQLMVQEVERSANTLSTFDESTSVLRKAEGEYQGHRSLLMRTRGLLSMMQRQDVLDRIILTIGFLVFSLAVLYVVSRRIGLLTLQRKLADAIRSGSVSAGDILAKVQEGPAPTDGPPIYDEL*	278	30533.9	5.74
TraesCS6D02G231000	TaSEC203-6D	Qb	837	MDEVTQAVENLKKEWSQAVEQLEVCIAAIESCGKMGKGTEEAMSLPRLNGSAQDALQLLNALQCRLDLLAEQLPTFEEVQSGQATLGSWKEQYQRLRVNLRSANLQAKANIGKAAQEERGLLLGGGEESTVRRRNLQTKAGMTSAAESITESLRRSRQLMVQEVERSANTLSTFDESTSVLRKAEGEYQGHRSLLMRTRGLLSTMQRQDVLDRIILTIGFLVFSLAVLYVVSRRIGLLTLQRKLADAIRSGSVSAGDILAKVQEGPAPTDAPPIYDEL*	278	30587.9	6.08
TraesCS3A02G074700	TaSEC204-3A	Qb	831	MDEVTQAVENLKKEWSQAVAQLEVCIAAIESCGKMGKGTEEAMSLPRLNGSAQDALQLLNALQCRLDLLAEQLPTFEEVQSGQATLGSWKEQYQRLRVRLRSANLQAKANMGKAAQEERELLLGGGEESTIRRRNLHHKHISCLEECRYANSILSGISVRTKAGMTSAAESITESLRRSRQLMVQEVERSANTLSTFDESTSVLRKAEGEYQGHHSLLMRTRGLLSTMQRQDVLDRIILTVGFLIISLAVLYVVSRRIGLLTLQRKLADAIRSGSV*	276	30680.2	8.84
TraesCS1A02G363200	TaVTI11-1A	Qb	594	MSDVFEGYERQYREISAALSRKCAAASALDGEKKQQKLSEIQAHVQESGSLIRKMDSEAQSLPPTVRAGLLSKLRQYKSDLNNIKSEIKRVSAPNAQQATREELLDSGMPDSLGASSDQRGRLMMTSERLNQSSDRIRESQITALDTEEIGVSILQNLHNQRETLMHAHKTLHGVDDSIGKSNKILASMSKWNKWFV	197	22041.8	8.65
TraesCS1B02G380400	TaVTI11-1B	Qb	417	MDLEARSLPPTVKAGLLSKLRQYKSDLNNIKSEIKKASAPNAQQATREELLDSGMPDTLGRGRLMMTSERLNQSSDRIRESQITALDTEEIGVSILQNLHNQRVTLMHAHKTLHGVDDSIGKSNKILASMSKWNKWFV*	138	15482.7	9.52
TraesCS1D02G368200	TaVTI11-1D	Qb	594	MSEVFEGYERQYREISAALSRKCAAASALDGEKKKQKLPEIQADVQESESLIRKMDLEARSLQPTVRAGLLSKLREYKSDLNNIKSEIKKVSAPNAQQATREELLDSGMPDTLGASSDQRGRLMMTSERLNQSSDRIRESQITALDTEEIGVSILQNLHNQRETLMHAHKTLHGVDDSIGKSNKILASMSKWNKWFV*	197	22188.1	7.83
TraesCS3A02G252300	TaVTI12-3A	Qb	666	MSEVFEGYERQYCEESASLSRKCTAASALDGEKKKQRLSEIQSGVQEAESLIRRMDLEARNTPPSVKAGLLAKLREYKSDLNNLKSELKRISAPNARQTTKEELLESGMADTLAVSTDQRGRLMMTTERLNQSTDRIKESRRTMLETEELGVSILQDLHQQRQSLLHAHDTLHGVDDNVGKSKKILSAMSKRMDRNKWIIGGIISALVVAILIILYFKLAH*	221	24927.6	9.02
TraesCS3B02G283800	TaVTI12-3B	Qb	666	MSEVFEGYERQYCEESASLSRKCTAASALDGEKKKQRLSEIQSGVQEAESLIRRMDLEARNTPPSVKAGLLAKLREYKSDLNNLKSELKRISAPNARQTTKEELLESGMADTLAVSTDQRGRLMMTTERLNQSTDRIKESRRTMLETEELGVSILQDLHQQRQSLLHAHDTLHGVDDNVGKSKKILSAMSKRMDRNKWIIGGIISALVVAILIILYFKLAH*	221	24927.6	9.02
TraesCS3D02G252800	TaVTI12-3D	Qb	666	MSEVFEGYERQYCEESASLSRKCTVASALDGEKKKQRLSEIQSGVQEAESLIRRMDLEARNTPPSVKAGLLAKLREYKSDLNNLKSELKRISAPNARQTTKEELLESGMADTLAVSTDQRGRLMMTTERLNQSTDRIKESRRTMLETEELGVSILQDLHQQRQSLLHAHDTLHGVDDNVGKSKKILSAMSKRMDRNKWIIGGIISALVVAILIILYFKLAH*	221	24955.6	9.02
TraesCS1A02G363100	TaVTI13-1A	Qb	663	MSDVFEGYAGQYCEISAALSRKCAAASALDGEKKKQKLSEIQADVQESESLIRRMDLEARSMQPSVKAGLLAKLREYKSDLNSVKGEIKRLSAPNAQQATREELLESGMSDTLAASSDQRGRLMMTSERLNQSSDRIRESQRTVFETEEIGVSILQDLHNQRQSLLHAHTTLHGVDDYIGKSKKILASMSKRMDRNKWIVGSIIATLVFAILFILYFKFA*	220	24649.2	8.8
TraesCS1B02G380300	TaVTI13-1B	Qb	663	MSEVFEGYAGQYCEISAALSRKCAAASALDGEKKQQKLSEIQADVQESESLIRRMDLEARSMQPSVKAGLLAKLREYKSDLNNVKGEIKRLSAPNAQQATREELLESGMSDTLSASSDQRGRLMMTSERLNQSSDRIRESQRTVFETEEIGVSILQDLHNQRQSLLHAHTTLHGVDDYIGKSKKILASMSKRMDRNKWIVGGIIATLVFAILFILYFKFA*	220	24676.2	8.48
TraesCS1D02G368100	TaVTI13-1D	Qb	663	MSEVFEGYAGQYCEISAALSRKCAAASALDGDKKQQKLSEIQADVQESESLIRRMDLEARSMQPSVKAGLLAKLREYKSDLNNVKGEIKRLSAPNAQQATREELLESGMSDTLTASSDQRGRLMMTSERLNQSSDRIRESQRTVFETEEIGVSILQDLHNQRQSLLHAHTTLHGVDDYIGKSKKILASMSKRMDRNKWIVGGIIATLVLAILFILYFKFA*	220	24642.1	8.48
TraesCS3A02G207400	TaVTI14-3A	Qb	666	MTDVFQGYERQYCEISASLSRKCTTAASQEGEKLKQKASEIKSGIDGAEALIRKMDLEARNLQPSVRAGQLAKLREYKSDLNNLKGALKRITAGNGQQGAREELLESGMADTLVVSADQRSRLLRTTERQNQSTDRIRDSHRTMLETEELGVSIMHDLHQQRQSLLHANDTLHDVDDNVGKSRKIMGAMVRRMDRNKWIIGLLIALLVLAILVVLYFKFVH*	221	24946.6	9.25
TraesCS3B02G234600	TaVTI14-3B	Qb	666	MTDVFQGYERQYCEISASLSRKCTAAASQEGEKLKQKASEIKSGIDGAEALIRKMDLEARNLQPSVRAGQLAKLREYKSDLNNLKGTLKRITAGNGQQGAREELLESGMADTLVVSADQRSRLLRTTERQNQTTDRIRDSHRTMLETEELGVSIMHDLHQQRQSLLHANDTLHDVDDSIGKSRKIMGAMVRRMDRNKWIIGLLIALLVLAILVVLYFKFVH*	221	24947.6	9.25
TraesCS3D02G208300	TaVTI14-3D	Qb	666	MTDVFQGYERQYCEISASLSRKCTAAASQEGEKLKQKASKIKSSIDGPEALIRKMDLEARNLQPSLRAGQLAKLREYKSDLNNLKGVLKRITAGNGQQGAREELLESGMADMLVVSADQRSRLLRTTERQNQTTDRIRDSHRTMLETEELGVSIMHDLHQQRQSLLHANDTLHDVDDNIGKSRKIMGAMVRRMDRNKWIIGLLIALLVLAILVVLYFKFLH*	221	25085.9	9.48
TraesCS3D02G207900	TaVTI14-3D2	Qb	666	MTDVFQGYERQYCEISASLSRKCTAAASQEGEKLKQKASEIKSGIDGAEALIRKMDLEARNLQPSVRAGQLAKLREYKSDLNNLKGALKRITAGNGQQGAREELLESGMADTLVVSADQRSRLLRTTERQNQTTDRIRDSHRTMLETEELGVSIMHDLHQQRQSLLHANDTLHDVDDNIGKSRKIMGAMVRRMDRNKWIIGLLIALLVLAILVVLYFKFVH*	221	24944.6	9.25
TraesCS2A02G180800	TaSNAP1-2A1	Qb+Qc	789	MHVSSVAKPLSSKPNPFDSDSDSEFTSRPARASSSNSVDPGANGRYKNEFHDSGGFDNQSVQELEVYVAYKAEETTQKVNVCLRLAENIKEDATNTMIALHKQGQQMNRTHETAANIDQDLSRSETLLGSLGGFFAKTWKPKKTRQIKGSSVISRDDSFKRRANHLEQREKLGLSSSPRGKSDPQKYSDPTNAMEKVQVEKDNQDNALSDLSDVLGQLKGMALDMGSEIDMWEKGGMGTQPEHTRSRTLEGSLSTADRRRTW*	262	29100.1	6.62
TraesCS2A02G181400	TaSNAP1-2A2	Qb+Qc	792	MPVSSVAKPLSSKPNPFDSDSDSEFTSRPTRASSSNSVDPGANGRYKNGFRDSGGFDNQSVQELEGYVAHKAEEVTQKVSVCLRLAENIKEDATNTMIALHKQGQQMNRTHETAANIDQDLSRSETLLGSLGGFFSKTWKPKKTRQIRGPAVISRDDSFKRRANHLEQREKLGLSSSLREKSSSQTYSDPTNAMEKVQVEKDKQDNALSDLSDVLGQLKGMALDMGSEIDRQNKAIDGLQDDVEELNSRVKGANQRARRLLEK*	263	29117.2	7.8
TraesCS2B02G208000	TaSNAP1-2B	Qb+Qc	786	MPVSSVAKPSSAKPNPFDSDSDSEFTSRPARASSSNSVDPGTNGRCKNGFRDSGGFDNQSVQELESYVAYKAEETTQKVNVCLRLAENIKEDATNTLIALHKQGEQMNRTHETAANIDQDLSRSETLLGSLGGFFSKTWKPKKTRQIKGPAVISRDDPFKRRANHLEQREKLGLSSSPRGKSNPQTYSDPTNAMEKVEKDKQDNALSDLSDVLGQLKGMALDMGSEIDRQNKAMDGLQDDVEELNSRVKGANQRARRLLGK*	261	28732.8	8.41
TraesCS2D02G189300	TaSNAP1-2D	Qb+Qc	792	MPVSSVAKPLSSKPNPFDSDSDSEFTSRRARASSSNSVDPGANGRYKNGFRDSGGFDNQSVQELEGYVAHKAEEVTQKVNVCLRLAENIKEDATNTMIALHKQGQQMNRTHETAANIDQDLSRSETLLGSLGGFFSKTWKPKKTRQIKGPAVISRDDPFKRRANHLEQREKLGLSSSPVGKSDPQKYSDPTNAMEKVQVEKDKQDNALSDLSDVLGQLKGMALDMGSEIDRQNKAMDGLQDDVEELNSRVKGANQRARRLLGK*	263	29021.3	8.82
TraesCS3A02G391300	TaSNAP2-3A	Qb+Qc	771	MPVARGAKKPGPVDSDSDDDGLISKKPTKSSTYSVPTGNKKQYKDGFKDSGGLENQSVEELENYAAYKAEETTDTLNGCLRIAENIKEDAANTMITLQKQGEQISRTHEKAVEIDQDLAKGEGLLNSLGGFFSKPWKPKKTKKIKGPVSRDDSFKKKTSRMEQRDKLGLSPRGKGNTREYGDATNAMDKVQLEKKKQDDALDDLSGVLGQLQGMAVDMGSELDRQNKALDDMHGDVEELNSRVKQANQRARKILAD*	256	28207.5	7.68
TraesCS3B02G423500	TaSNAP2-3B	Qb+Qc	771	MPVARGAKKPGPVDSDSDDDGLVSKKPTKSSTYSVPTGNKKQYKDGFKDSGGLENQSVEELENYAAYKAEETTDTLNGCLRIAENIKEDATNTMITLQKQGEQISRTHEKAVEIDQDLTKGEGLLNSLGGFFSKPWKPKKTKKIKGPVSRDDSFKKKVNRMEQRDKLGLSPRGKGNTREYGEATSAMDKVQLEKKKQDDALDDLSGVLGQLQGMAVDMGSELDRQNKALDDMHGDVEELNSRVKQANQRARKILAD*	256	28265.6	7.68
TraesCS3D02G384300	TaSNAP2-3D	Qb+Qc	771	MPVARGAKKPGPVDSDSDDDGLVSKKPTKSSTYSVPTGNKKQYKDGFKDSGGLENQSVEELENYAAYKAEETTDTLNGCLRIAENIKEDATNTMITLQKQGEQISRTHEKAVEIDQDLTKGEGLLNSLGGFFSKPWKPKKTKKIKGPVSRDDSFKKKTSRMEQRDKLGLSPRGKGNTREYGEATSAMDKVQLEKKKQDDALDDLSGVLGQLQGMAVDMGSELDRQNKALDDMHGDVEELNSRVKQANQRARKILAD*	256	28240.6	7.68
TraesCS4A02G435200	TaSNAP3-4A	Qb+Qc	942	MSAARSSFFASHNGKKKPAASAARNPFDSDSDDDGGMVQRRGPARASSVPTPAAPPARASPAPVPSDERNSLFAGSAAPGPASSSSSSSAAAARRRYGSDFRDSGGVEAQSVQELEGYAAYKAEETTRRVDGCLRVAEEMRDTASKTLLQVHQQGQQIRRTHAMALDIDQDLSRGEKLLGDLGGLFSKKWKPKKNGAIRGPMLTRDDSFIRKGSHMEQRHKLGLSDRPRRSNARQFLSEPTSELEKVEVEKAKQDDGLSDLSDILTELKGMAIDMGTEIEGQTKDLGHAEKDFDELNYRVKGANTRTRRLLGR*	313	34012.8	9.33
TraesCS7A02G049300	TaSNAP3-7A	Qb+Qc	876	MSAARSSFFASNNAKKNPFDSDSDSDDDGGMVQRRASSVPTPADERNSLFATDPAPSGFASSSSSSSAAAARRRYGSDFRDSGGVEAQSVQELEGYAAYKAEETTRRVDGCLRVAEEMRDTASKTLLQVHQQGQQIRRTHAMALDIDQDLSRGEKLLGDLGGLFSKKWKPKKNGAIRGPMLTRDDSFIRKGSHMEQRHKLGLSDRPRRSNARQFLSEPTSELEKVEVEKAKQDDGLSDLSDILTELKGMAIDMGTEIEGQTKDLGYAEKDFDELNYRVKGANTRTRRLLGR*	291	32133.6	6.94
TraesCS7D02G044400	TaSNAP3-7D	Qb+Qc	918	MSATRSSFFGSNGKKKPAASARNPFDSDSDDDGGMVQQRPPMRASSVPTPAAAPVPADERNSLFAGAAAAGPGPSGFASSSSAAARGRYRNDFRDSGGVEAQSVQELEGYAAYKAEETTRRVDGCLRVAEEMRDTASKTLLQVHQQGQQIRRTHAMALDIDQDLSRGEKLLGDLGGLFSKKWKPKKNGAIRGPMLTRDDSFIRKGSHMEQRHKLGLSDRPRRSNARQFLSEPTSELEKVEVEKAKQDDGLSDLSDILTELKGMAIDMGTEIEGQTKDLGHAEKDFDELNYRVKGANTRTRRLLGR*	305	33298.1	9.06
TraesCS4A02G055800	TaSNAP4-4A	Qb+Qc	750	MSVSMNMRQNSVSTPIRRTTNPFDSDSDSEVPSRPSRAQSAPTQHTNQSVQELEDYTLRKAEETSSKANDCVRAAEAIREDATQILLTLHRQGEQITHTHRVAADIEHDLTMSEKLLGSLGGLFSKTWRPKRNQHIKGPVSQNSSFKSTTNQMEQRQNLGIGSRPQQFPSSVHSAPATAMNKIKAEKARQDDAFADLSNMLENLKDMALDMGTEIDRQNKSLDTFSDDVDELNFRVKGANQRGRRLLGK*	249	27866	7.91
TraesCS4B02G249000	TaSNAP4-4B	Qb+Qc	750	MSVSMNMRQNSVSTPIRRTTNPFDSDSDSEVPSRPSRAQSAPMQHTNQSVQELEDYTLRKAEETSSKVNDCVRAAEVIREDATQILLTLHRQGEQITHTHRVAADIEHDLTISEKLLGSLGGLFSKTWRPKRNQHIKGPVSQNSSFKSTSNQMEQRQNLGIGSRRQQSPSSVHSAPATAMDKIKAEKARQDDAFADLSNMLGDLKDMALDMGTEIDRQNKSLDTFSDDVDELNFRVKGANQRGRRLLGK*	249	27849	7.91
TraesCS4D02G249100	TaSNAP4-4D	Qb+Qc	750	MSVSMNMRQNSVSTPIRRTTNPFDSDSDSEVPSRPSRAQSAPTQHTNQSVQELEDYTLRKAEETSSKANDCVRAAEAIREDATQILLTLHRQGEQITHTHRVAADIEHDLTMSEKLLGSLGGLFSKTWRPKRNQHIKGPVSQNSSFKSTSNQMEQRQNLGIGSRPQQSPSSAHSAPATAMDKIKAEKARQDDAFADLSNMLGNLKDMALDMGTEIDRQNKSLDTFSDDVDELNFRVKGANQRGRRLLGK*	249	27692.7	7.91
TraesCS6A02G399100	TaBET1-6A	Qc	366	MNARGYRSTRTALFDGIEEGGIRSSAYSSHEIDEHENERAMDGLQDRVSILKRISGDINEEVEAHNRMLDRMGNDMDSSRGFLSGTVDKFKTVFETKSSRRMGTLVASFVALFMLVYYLTR*	121	13751.4	5.91
TraesCS6B02G439400	TaBET1-6B	Qc	366	MNARGFRSTRTALFDGIEEGGIRASAYSSHEIDEHENERAVDGLQDRVSILKRISGDINEEVEAHNRMLDRMGNDMDSSRGFLSGTVDKFKTVFETKSSRRMGTLVASFVALFMLVYYLTR*	121	13687.4	5.91
TraesCS6D02G383300	TaBET1-6D	Qc	366	MNARGYRSTRTALFDGIEEGGIRASAYSSHEIDEHENERAMDGLQDRVSILKRISGDINEEVEAHNRMLDRMGNDMDSSRGFLSGTVDKFKTVFETKSSRRMGTLVASFVALFMLVYYLTR*	121	13735.4	5.91
TraesCS2A02G187500	TaSFT11-2A	Qc	366	MANPMYGSGPLRSRNASSSDEIQLRIDPVHGDLDEEIDGLHSRVRMLKGVAQEINSEAKFQNDFLNQLQLTLTKAQAGVKNNMRRMNKSIIQQGSNHIVHVVLFALLCFFVVYLLSKFSRR*	121	13714.8	9.57
TraesCS2B02G219800	TaSFT11-2B	Qc	366	MANPMYGSGPLRSRNAPSSDEIQLRIDPVHGDLDEEIDGLHSRVRMLKGVAQEINSEAKFQNDFLNQLQLTLTKAQAGVKNNMRRMNKSIIQQGSNHIVHVVLFALLCFFVVYLLSKFSRR*	121	13724.8	9.57
TraesCS2D02G200400	TaSFT11-2D	Qc	366	MANPMYGSGPLRSRNAPSSDEIQLRIDPVHGDLDEEIDGLHSRVRMLKGVAQEINSEAKFQNDFLNQLQLTLTKAQAGVKNNMRRMNKSIIQQGSNHIVHVVLFALLCFFVVYLLSKFSRR*	121	13724.8	9.57
TraesCS5A02G062300	TaSYP51-5A	Qc	699	MASSSDPWMKEYTEASKLVDDISSMIADRSSLPQSGPEIMRHTSAIRRKITILGTRLDSLVTLLSRIPPKSLTDKEMHKRQDALSNLKSKAKQMGTSFNVSNFANREDLLGQSKKAADDMSRVAGLDNQGIVGLQRQVMREQDEGLERLEETVLSTKHIALAVNEELTLHTRLIDDLEDHVDVTNSRLQRVQKRLAILNKRAKGGCSCMCLMLSVAAIVLLAVIVWLLIKYL*	232	25911	8.97
TraesCS5B02G069400	TaSYP51-5B	Qc	699	MASSSDPWMKEYTEASKLVDDISSMIADRSSLPQSGPEIMRHTSAIRRKITILGTRLDSLVTLLSRIPPKSLTDKEMHKRQDALSNLKSKAKQMGTSFNVSNFANREDLLGQSKKAADDMSRVAGLDNQGIVGLQRQVMREQDEGLERLEETVLSTKHIALAVNEELTLHTRLIDDLEDHVDVTNSRLQRVQKRLAILNKRAKGGCSCMCLMLSVAAIVLLAVIVWLLIKYL*	232	25911	8.97
TraesCS5D02G073500	TaSYP51-5D	Qc	699	MASSSDPWMKEYTEASKLVDDISSMIADRSSLPQSGPEIMRHTSAIRRKITILGTRLDSLVTLLSRIPPKSLTDKEMHKRQDALSNLKSKAKQMGTSFNVSNFANREDLLGQSKKAADDMSRVAGLDNQGIVGLQRQVMREQDEGLERLEETVLSTKHIALAVNEELTLHTRLIDDLEDHVDVTNSRLQRVQKRLAILNKRAKGGCSCMCLMLSVAAIVLLAVIVWLLIKYL*	232	25911	8.97
TraesCS4B02G347500	TaSYP52-4B	Qc	777	MSNVNRPHPVLPMATFQPKGFAPSPAPSPLEQWTKRFQEAERLVEEVMGNIAERGSVPASLPLELKRRTGEIRRKVAILETRLSLMREDLDRLPNRNVKEMRKLAEKFDALELKVKEVAAPFTMKKHSSNRNELLGPSDHRCTVVDIKSTANMENQEIVQLQRNIMKEQDECLDRLEETIVSTKHIALAINEELDLHVRLIDDLDERVEDTSTQLQRAQKKLKSLNTRMRKSGSCTGILMTVIAGVIFVAVVWALIKF*	258	29427.2	8.96
TraesCS6A02G059100	TaSYP53-6A	Qc	699	MASSADPWVREYGEAARLADDVASMVADRAALPQSGPEVMRHTSAIRRKITILGTRLDSLEGMLARLPPKSITDKELNKRRDTLSNLKSRAKQMAESFNMSTFANREDLLGQSKKAADDMSRVAGLDNQGIVGLQRQIMKEQDEGLEKLEQTVLSTKHIALAVNEELDLHARLIDDLDDHVDGTNSRLQRVQKRLAVLNKRAKGGCSCMSLLLSTVGIVMLVVIVWLLIKYL*	232	25733.8	8.86
TraesCS6B02G079400	TaSYP53-6B	Qc	699	MASSVDPWVREYGEAARLADDVAAMVADRAALPQSGPEVMRHTSAIRRKITILGTRLDSLEGMLARLPPKSITDKELHKRRDTLSNLKSRAKQMAESFNMSTFANREDLLGQSKKAADDMSRVAGLDNQGIVGLQRQIMKEQDEGLEKLEQTVLSTKHIALAVNEELDLHARLIDDLDDHVDGTNSRLQRVQKRLAVLNKRAKGGCSCMSLLLSTVGIVMLVVIVWLLIKYL*	232	25768.8	8.87
TraesCSU02G121500	TaSYP53-U	Qc	699	MASSADPWVREYGEAARLADDVAAMVADRAALPQSGPEVMRHTSAIRRKITILGTRLDSLEGMLARLPPKSITDKELNKHRDTLSNLKSRAKQMAESFNMSTFANREDLLGQSKKAADDMNRVAGLDNQGIVGLQRQIMKEQDEGLEKLEQTVLSTKHIALAVNEELDLHARLIDDLDDHVDGTNSRLQRVQKRLAVLNKRAKGGCSCMSLLLSTVGIVMLVVIVWLLIKYL*	232	25725.7	8.52
TraesCS1A02G276400	TaSYP61-1A	Qc	1008	MAEGFGRWESDPLFPAAECVQDSADRMDGVYRLLLHEKKVIQDDTSDAKLHAPIQYERDVATALGTTKWQLEQFEREVNAAAFSDKSTSRENAILKFRQFIRAIAEQISEVEESLKTLRTDFSRTPKSPYSSSEQDGDGLASFLSGGNSHSHAYYSTDTNEITELKLDSAPMVNGYHSAQEHTTRELRYSGNDVEGASKLQCSRGESASEGDHYGSTLCSLDADDSLGTSHHYKNKLSSQYRSFMRNLWFTNRDHQSFTKRRKDGEVVDGLRNGNILPPFNLRTSGRTTYCWPELIKRTLSRSEYSTRYNHPQLFVATSLLVALAVLGLLVLHVK*	335	37764.8	6.07
TraesCS1B02G285600	TaSYP61-1B	Qc	1008	MAEGFGRWESDPLFPAAECVQDSADRMDGVYRLLLHEKKVIQDDTSDAKLHAPIQYERDVVTALGTTKWQLEQFEREVNAAAFSDKSTSRENAILKFRQFIRAIAEQISEVEESLKTLRTDFSRTPKSPYPSSEQDGDGLASFLSGGNNHSHAYYSTDTNEITELKLDSAPMVNGYHSAQEDTSRELRYSGNDVEGASKLQCSRGESASEVDHNGSTLCSLDADDSLGTSHHYKNKLSSQYRSFMRNLWFTNRDHESFTKRRKDGEVVDSLRNGNILPPFNLRTSGRTMYCWPELIKRTLSRSEYSTRYNHPQLFVATSLLVALAVLGLLVLHAK*	335	37819.9	5.8
TraesCS1D02G275900	TaSYP61-1D	Qc	1008	MAEGFGRWESDPLFPAAECVQDSADRMDGVYRLLLHEKKVIQDDTSDAKLHAPIQYERDVATALGTTKWQLEQFEREVNAAAFSDKSTSRENAILKFRQFIRAIAEQISEVEESLKTLRTDFSRTPKSPYSSSEQDGDGLASFLSGGNNHSDAYYSTDTNEITELKLDSAPMMNGYHSAQEHTTRELRYSGNDVEGASRLQCSRGESASEVDHNGSTLCSLDADDSLGTSHHYKNKLSSQYRSFMRNLWFTNRDHESFTKRRKDGEVVDSLRNGNILPPFNLRTSGRTMYCWPELIKRTLSRSEYSTRYNHPQLFVATSLLVALAVLGLLVLHVK*	335	37884	5.8
TraesCS3A02G508700	TaSYP62-3A1	Qc	672	MEGQWDEIGKLQTTFHWWGQVSSNTGEYVQLTKELLTSCESIEWQVDELEKTISVASRDPAYYVLDEVELSRRQNWTGSARNQIGTVKRAVEKGKSNPAMARHQDNGTSRTNYYSSQDNDDYIASESDRELLLMRQQDDELDELSANVQRIGGVGLTIHEELCGQERILNNLSLEMETTSNRLDIVQKRVAMVMKKAGIKGQIMLILFLVVLFIILFVLVFLT*	223	25465.8	4.87
TraesCS3A02G508800	TaSYP62-3A2	Qc	705	MSSAQDPFYIVREEIQGSIGKLQTTFHRWEQVSSNTGEYVHITKELLTSCESIEWQVDELEKTISVASRDPAYYGLDEVELSRRRNWTGSARNQIGTVKRAVEKGKSNPAMARHQDNGTSRTNYYSSQDNDDYIASESDRQLLLMRQQDDELDELSASVQRIGGVGLTIHEELSGQERILNNLSLEMETTSNRLDFVQKRVAMVMKKAGIKGQIMLILFLVVLFIILFVLVFLT*	234	26656.1	5.24
TraesCS3B02G577200	TaSYP62-3B	Qc	705	MSSAQDPFYIVREEIQGSIGKLQTTFHRWEQVSSNTGEYIHLTKELLASCESIEWQVDELEKTISVASRDPAYYGLDEVELSRRRNWTGSARNQIGTVKRAVEKGKSNPAMARHQDNGTSRTNYYSSQDNDDYIASESDRQLLLMRQQDDELDELSASVQRIGGVGLTIHEELSGQERILNNLSLEMETTSNRLDFVQKRVAMVMKKAGIKGQIMLILFLVVLFIILFVLVFLT*	234	26640.1	5.24
TraesCS3D02G516200	TaSYP62-3D	Qc	705	MSSAQDPFYIVREEIQGSIGKLQTTFHRWEQVSSNTGEYVHLTKELLTSCESIEWQVDELEKTISVASRDPAYYGLDEVELSRRRNWTGSARNQIGTVKRAVEKGKSNPAMARHQDNGTSRTNYYSSQDNDDYIASESDRQLLLMRQQDDELDELSASVQRIGGVGLTIHEELSGQERILNNLSLEMETTSNRLDFVQKRVAMVMKKAGIKGQIMLILFLVVLFIILFVLVFLT*	234	26656.1	5.24
TraesCS4A02G049700	TaSYP63-4A	Qc	1071	MATSFDRWEKDPFFLAAEEVQESADRMESVYKIWVQERSGGDSALGGEVGAVELRRELHTALGTAKWQLDELERAIRSNDEVVSAGKDTRALHSNFVAAIGYRILEVENNLNASNVAEGRGTLSWIHLDESERDDLAAFLSATPPQHQDKVVTIPSAGDIQVGSNPTRVRKNISADSSNDSSGSADLSSARAKEDAHRGHRRSVSASADIGSSPMSFPNEREGAAEQSSLGPHRAPLLNIVKACGLPSALKPKPAIKYKKGAVRWAHADKQDLEAAIPLTNPQLGQGLDGYSERSIGYLNTCDGVTYNKKLYGWLGALRKKLQRSQYQIRYGRPAQLILFALAVLIIFVFVFKTIW*	356	39014.8	7.11
TraesCS4B02G255000	TaSYP63-4B	Qc	1071	MATSFDRWEKDPFFLAAEEVQESADRMESVYKIWVQERSGGGSALGGEVGAAELRRELHTALGTAKWQLDELERAIRSNDEVVSAGKDTRALHSNFVAAIGYRILEVENNLNASNVAEGRGTLSWIHLDESERDDLAAFLSATPPQHQDKVVTIPSAGDIQVGSNPTRVRKNISADSSNDSSGSADLSSARAKEDAHRGHRRSVSASADIGSSPMSFPNEREGAAEQSSLGPHRAPLLNIVKACGLPSALKPKPAVKYKKGAVRWAHADKQDLEAAIPLTNPQLGQGLDGYSERSIGYLNTCDGVTYNKKLYGWLGALRKKLQRSQYQIRYGRPAQLIVFALAVLIIFVFVFKTIW*	356	38900.7	7.78
TraesCS4D02G254800	TaSYP63-4D	Qc	1071	MATSFDRWEKDPFFLAAEEVQESADRMESVYKIWVQERSGGGSALGGEVGAAELRRELHTALGTAKWQLDELERAIRSNDEVLSAGKDTRALHSNFVAAIGYRILEVENNLKASNVAEGRGTLSWIHLDESERDDLAAFLSAGPPQHQDKVVTIPSAGDIQVGSNPTRVRKNISADSSNDSSGSADLSSARAKEDAHRGHRRSVSASADIGSSPMSFPNERDGAAEQSSLGPHRAPLLNIVKACGLPSALKPKPAIKYKKGAVRWAHADKQDLEAAIPLTNPQLGQSLDGYSERSISYLNTCDGVTYNKKLYGWLGALRKKLQRSQYQIRYGRPAQLILFALAVLIIFVFVFKTIW*	356	38958.8	8.38
TraesCS4A02G208100	TaSYP64-4A	Qc	708	MTPAQDPFYIVKDEIQDSIDKVQDTFNQWKQAPENTGEYVHLTRELLTTCESVQWQVDELEKAISVAERDPAYYGLNEVEIGKRRNWTSTARNQVVAIRRNVEAGKHKTAFGRSVNPSELGRSKQHIAQDNDDFIASESDQQMLLMKRQDDELDALSASVQRIGGVGLTIHEELVGQEKLLGELSLDMETTSNRLDFVQKRVAMVLKKASLKGQIMMIAFLVVLFIILFVLVFLT*	235	26671.4	5.13
TraesCS4B02G111700	TaSYP64-4B	Qc	708	MTPAQDPFYIVKDEIQDSIDKIQDTFNQWKQAPENTGEYVHLTRELLTTCESVQWQVDELEKAISVAERDPAYYGLNEVEIGKRRNWTSTARNQVVSIRRNVEAGKHKTAFGRSVNPSELGRSKQHISQDNDDFIASESDQQMLLMKRQDDELDALSASVQRIGGVGLTIHEELVGQEKLLGELSLDMETTSNRLDFVQKRVAMVLKKASLKGQIMMIAFLVVLFIILFVLVFLT*	235	26717.4	5.13
TraesCS4D02G109300	TaSYP64-4D	Qc	708	MTPAQDPFYIVKDEIQDSIDKVQDTFNQWKQAPENTGEYVHLTRELLTTCESVQWQVDELEKAISVAERDPAYYGLNEVEIGKRRNWTSTARNQVVSIRRNVEAGKHKTAFGRSVNPSELGRSKQHIAQDNDDFIASESDQQMLLMKRQDDELDALSASVQRIGGVGLTIHEELVGQEKLLGELSLDMETTSNRLDFVQKRVAMVLKKASLKGQIMMIAFLVVLFIILFVLVFLT*	235	26687.4	5.13
TraesCS1A02G379800	TaSYP71-1A	Qc	813	MTVIDILTRVDAICQKYDKYDAEKLNGANVAGEDPFARLYGSVDAEISQCVEKAEAARQEKNRATVVALNAEIRRAKAKLLEEDLPKLQRLALKKVKGLTKEELATRSDLVAALPDRIQSIPDGSSSATKKNGGWGASGSRPGGGVKFDSTSDGNFDDEYFKGTEESNKFRQEYEMRRMKQDEGLDVIGEGLATLKNMASDMNEELDRQVPLMDEMDDKVDRANADLKNTNVRLKQTILQMRSSRNFCVDIILLCIILGIAAYLYNVLKK*	270	30033.2	5.42
TraesCS1B02G401800	TaSYP71-1B	Qc	813	MTVIDILTRVDAICQKYDKYDAEKLNGANVAGEDPFARLYGSVDAEISQCVEKAEAARQEKNRATVVALNAEIRRAKAKLLEEDLPKLQRLALKKVKGLTREELATRSDLVAALPDRIQSIPDGSSSATKKNGGWGASGSRPGGGVKFDSTSDGNFDDEYFKGTEESNKFRQEYEMRRMKQDEGLDVIGEGLATLKNMASDMNEELDRQVPLMDEMDDKVDRANADLKNTNVRLKQTILQMRSSRNFCVDIILLCIILGIAAYLYNVLKK*	270	30061.2	5.42
TraesCS1D02G387200	TaSYP71-1D	Qc	813	MTVIDILTRVDAICQKYDKYDAEKLNGANVAGEDPFARLYGSVDAEISQCVEKAEAARQEKNRATVVALNAEIRRAKAKLLEEDLPKLQRLALKKVKGLTKEELATRSDLVAALLDRIQSIPDGSSSATKKNGGWGASGSRPGGGVKFDSTSDGNFDDEYFKGTEESNKFRQEYEMRRMKQDEGLDVIGEGLATLKNMASDMNEELDRQVPLMDEMDDKVDRANADLKNTNVRLKQTILQMRSSRNFCVDIILLCIILGIAAYLYNVLKK*	270	30049.2	5.42
TraesCS1D02G190400	TaSYP72-1D	Qc	708	MTVIDILTRVDVICQKYDKYDAEKLNGANVAGEDPFARLYGSVDAEISYLLLQKAEAARQEKNRATVVALNTEIRRTKASSSRRTCPSCSASRSRSTERITKIKLVVLYKCSSSCCECILILRLTLFYGNFDDEYFKGTEESNKFCQEYEMRRMKQDEGLDVIGEGLATLKNMSSDMNEELDRQVPLMDEMDDKVDRANADLKNTNVRLKQTILQVKVHSSPCIILISPPTFTSK*	235	26637.5	6.63
TraesCS5B02G187300	TaSYP73-5B	Qc	786	MSMIDVLTRVDAICKKYERYDADKHRNDAADPFSRLYADMDAVIDEAIEKSERAARETNRAAAVTLNAGVRRTKARLLEEVAKLQKLAGKKMKGVSREEMALRPDLVSALHQRIQSIPDGGGAADQNGGGNARPGIKFDSSVAAETLDEGYFQTSEESEAFRMEFEMLRIKQDEGLDLISEGLDTLKNLAEDIGEELDRQVPLMDEIDRKVDKANTELRKTNVRLKEIVNQIRSTRNFTVDIILICIILGIGAYLYNVLAQ*	261	29191.2	5.1
TraesCS5D02G194900	TaSYP73-5D	Qc	780	MIDVLTRVDAICKNYERYDADKHRNDAADPFSRLYADMDAVIDEAIEKSERAARETNRAAAVTLNAGVRRTKARLLEEVAKLQKLAGKKMKGVSREEMALRPDLVSALHQRIQSIPDGGGAADQNGGGNARPGIKFDSSVAAETLDEGYFQTSEESEAFRMEFEMRRIKQVEGLDLISEGLNTLKNLAEDIGEELDRQVPIMDEIDRKVDKANTELRKTNVRLKEIVNQIRSTRNFTVDIILICIILGIGAYLYNVLAQ*	259	28984.9	5.27
TraesCS6A02G028000	TaUSE11-6A	Qc	1068	MANDPISQRNSSPPRLVGGAPPCRPAPCRACVRRASWPAPLRRGSGLIRLALPTRIVPQPLLLPPPIQSDGTRAGGARARPIRCSLVVVLWRASSRLRAAEYDRSHPRRRFHFTVRGIGGPDHGVQQGGSEPQKAASGGSSAAESGQACPSRELLEQLGAEITTEGVSRVSKTKLSEYSEKIEALAATLAASVKENENPVDEIKEESSCEREKAESPISLSAGLRRRSTAQVEAGTSSHDRKERETGGPIKLDAEAQANIEKHRDLQDSLIDEMVDLARELKKSSLVVNQSVQDTEKILDSTERAMEHSLASTGSATARASEVYSLASKTTCFQWLLIFLMTCMFVMVVMLIRVT*	355	38510.8	9.05
TraesCS6B02G039400	TaUSE11-6B	Qc	750	MIQQVLVPLIMVFSRVEVNLRRLLQEAPRQQNQAKLAHYISTARELLEQLGAEITTEGVPRGSKAKLSEYSEKIEALAATLAASVTENEKPVDEIKEESSCEREKAESPISLSAGLRRRSTAQVEAGTSSRDRTRRERDTGAPIKLDAEAQANIEKHRDLQDSLIDEMVDLARQLKESSLVVNQSVQDTVKILHSNERAMEHSLASTGSATARASEVYSLASKTTCFQWLLIFLMTCMFVMVVMLIRVT*	249	27757.7	5.93
TraesCS6D02G031300	TaUSE11-6D	Qc	714	MVFSKVEVNLRRLLQEAPQQQNQAKLAHYISTARELLEQLGAEITTEGVPRVSKAKLSEYSEKIEALAATFSAPVTENDDPVDEIKEESSLEREKVEGPISLSAVLRRRSTAQVEAGTSNNERKERDTGAPIKLDSEAQAHIEKHRNLQDSLIDEMVDLARQLKESSLVVNQSVQDTVKILDSTERAMEHSLASTGSATARASEVYSLASKTTCFQWLLIFLMTCMFVMVVMLIRVT*	237	26408	5.2
TraesCS6D02G059200	TaUSE12-6D	Qc	717	MVFSKVEVNLRRLLEAAPRQQNQAKLVHYITTARELLEQLGAEITPEGISSVSKAKLSEYSEKIEALAATLASLVPENENLVDESREQDSSYEREKVGSPISLSSGLRRRSTAQMEVGPSSHERKERDTGAPIKLDAEAQAHIEKHRKLQEDLTDEMVDLARQLKESSLLMNQSVQDTEKILDSTERAVEHSLASTGRATARASEVYSLASKTSCFQWLLIFLMTCMFVMVVLLVRIT*	238	26618.3	5.53
TraesCS7A02G261200	TaUSE12-7A	Qc	717	MVFSKVEVNLRRLLEAAPRQQNQAKLVHYITTARELLEQLGAEITPEGISSVSKAKLSEYSEKIEALAATLASLVPENENLVDESSEQDSSYEREKVGSPISLSSGLRRRSTAQMEVGPSSHQRKETDTGAPIKLDAEAQAHIEKHRKLQEDLTDEMVDLARQLKESSLLMNQSVQDTEKILDSTERAVEHSLASTGRATARASEVYSLASKTTCFQWLLIFLMTCMFVMVVLLIRIT*	238	26521.2	5.39
TraesCS7B02G159900	TaUSE12-7B	Qc	717	MVFSKVEVNLKRLLEAAPRQQNQAKLVHYITTARELLEQLGAEITPEGISSVSKAKLSEYSEKIEAVAATLASLVPENENLVDESREQDNSYEREKVGSPISLSSGLRRRSTAQMEVGPSSHERKEKDTGAPIKLDAEAQAHIEKHRKLQEDLTDEMVDLARQLKESSLLMNQSVQDTEKILDSTERAVEHSLASTGRATARASEVYSLASKTTCFQWLLIFLMTCMFVMVVLLIRIT*	238	26603.3	5.53
TraesCS7D02G263000	TaUSE12-7D	Qc	723	MVFSKVEVNLKRLLEAAPRQQNQAKLVHYITTARELLEQLGAEITPEGISSISKAKLSEYSEKIEALAATLASLVPENENLVDQSREQDNSYEREREKVGSPISLSSGLRRRSTAQMEVGPSSHERKEKDTGAPIKLDAEAQAHIEKHRKLQEDLTDEMVDLARQLKESSLLMNQSVQDTEKILDSTERAVEHSLASTGRATARASEVYSLASKTTCFQWLLIFLMTCMFVMVVLLIRIT*	240	26915.7	5.68
TraesCS3A02G157800	TaSEC221-3A	R	657	MVKLTMIARITDGLPLAEGLDDGRDLKDADFYKQQAKLLFKNLSKGQHESSRLSIETGPYYFHYIIESRVCYLTMCDRSYPKKLAFQYLEDLKNEFERVNGSQIETAARPYAFIKFDTFIQKTRRLYLDTRTQRNLAKLNDELYEVHQIMTRNVQEVLGVGEKLDQVSQLSSRLTSDTRMYADKAKDLNRQALIRKYAPVAIVMGIVLMLFWIKNKIW*	218	25523.5	9.27
TraesCS3B02G184700	TaSEC221-3B	R	435	MCDRSYPKKLAFQYLEDLKNEFERVNGSQIETAARPYAFIKFDTFIQKTRKLYLDTRTQRNLAKLNDELYEVHQIMTRNVQAVLGVGEKLDQVSQMSSRLTSDTRMYADKAKDLNRQALIRKYAPVAIVMGIVLMLFWIKNKIW*	144	16959.8	9.65
TraesCS3D02G165300	TaSEC221-3D	R	657	MVKLTMIARITDGLPLAEGLDDGRDLKDADFYKQQAKLLFKNLSKGQHESSRLSIETGPYYFHYIIESRVCYLTMCDRSYPKKLAFQYLEDLKNEFERVNGNQIETAARPYAFIKFDTFIQKTRKLYLDTRTQRNLAKLNDELYEVHQIMTRNVQEVLGVGEKLDQVSQMSSRLTSDTRMYADKAKDLNRQALIRKYAPVAIVMGIVLMLFWVKNKIW*	218	25526.6	9.25
TraesCS5A02G428800	TaSEC222-5A	R	657	MVKLTMIARVTDGLPLAEGLDDGRDQKDSDFYKQQAKLLFKNLSKGQHEASRMSIETGSYFFHYIIEGRVCYLTMCDRSYPKKLAFQYLEDLKNEFERVNGSQIETAARPYAFIKFDTYIQKTKKLYLDTRTQRNIAKLNDELYEVHQIMTRNVQEVLGVGEKLDQVSEMSSRLTSDTRIYADKAKDLNRQAFIRKYAPVAIVIGVVIILFWAKNKIW*	218	25389.3	9.13
TraesCS5B02G430800	TaSEC222-5B	R	657	MVKLTMIARVTDGLPLAEGLDDGRDQKDSDFYKQQAKLLFKNLSKGQHEASRMSIETGSYFFHYIIEGRVCYLTMCDRSYPKKLAFQYLEDLKNEFERVNGSQIETAARPYAFIKFDTYIQKTKKLYLDTRTQRNIAKLNDELYEVHQIMTRNVQEVLGVGEKLDQVSEMSSRLTSDTRIYADKAKDLNRQAFIRKYAPVAIVIGVVIILFWAKNKIW*	218	25389.3	9.13
TraesCS5D02G436900	TaSEC222-5D	R	657	MVKLTMIARVTDGLPLAEGLDDGRDQKDSDFYKQQAKLLFKNLSKGQHEASRMSIETGSYFFHYIIEGRVCYLTMCDRSYPKKLAFQYLEDLKNEFERVNGSQIETAARPYAFIKFDTYIQKTKKLYLDTRTQRNIAKLNDELYEVHQIMTRNVQEVLGVGEKLDQVSEMSSRLTSDTRIYADKAKDLNRQAFIRKYAPVAIVIGVVIILFWAKNKIW*	218	25389.3	9.13
TraesCS6A02G371800	TaVAMP711-6A	R	702	MGKKIQYAVVARGAVVLAEHGAGGTTTNAGAVARQILERLHAAGGGAAADCRVSYTQGLYVFHVMRADGLTALCMTDDDATAASGRRIPFAFLEDIHGKFVKTYGRAALTALAYAMNDEFSRVLSKQMDYYSNDPNADCITRMKGEMDQVRSIMIDNIDKVLERGDRLEMLVDKTTTMQGNTMRFKRQARRFRNTVWWRNVKLTAAVILILLAIIYIVLAYMCHGFTLPSCVR*	233	25842	9.35
TraesCS6B02G409400	TaVAMP711-6B	R	1401	MGKKIQYAVVARGAAVLAEHGAGGTTTNAGAVARQILERLHAAGGGAAADCRVSYTQGLYVFHVMRADGLTALCMTDDDATAASGRRIPFVFLEDIHGKFVKTYGRAALTALAYAMNDEFSRVLSKQMDYYSNDPNADCITRMKGEMDQVRSIMIDNIDKVLERGDRLEMLVDKTTTMQGNTMRFKRQARRFRNTVWWRNVKLTAAVILILLAIIYIVLAYMCHGFTLPSCVR*	466	51666	9.41
TraesCS6D02G355800	TaVAMP711-6D	R	702	MGKKIQYAVVARGAAVLAEHGAGGTTTNAGAVARQILERLHAAVGGAAADCRVSYTQGLYVFHVMRADGLTALCMTDDDATAASGRRIPFAFLEDIHGKFVKTYGRAALTALAYAMNDEFSRVLSKQMDYYSNDPNADCITRMKGEMDQVRSIMIDNIDKVLERGDRLEMLVDKTTTMQGNTMRFKRQARRFRNTVWWRNVKLTAAVILILLAIIYIVLAYMCHGFTLPSCVR*	233	25856	9.35
TraesCS7A02G136300	TaVAMP712-7A	R	666	MPILYAVVARGATVLAEHSAAATNAGAVARQVLERLPGGGADSHVSYTQDRYVFHAKRTDGITALCMADDAAGRRIPFAFLEDIHGKFVKTYGRAALTALAYAMNDEFSRVLSQQMDYYSNDPSADQINRMRGEISQVRSVMIDNIDKVLERGDRLDLLVDKTTTMQGNTVRFKRQARRYRSTTWWRNVKLTAALILLLLVIVYIALFFVCHGFTLPTCIR*	221	24752.5	9.48
TraesCS7B02G037300	TaVAMP712-7B	R	666	MPILYAVVARGATVLAEHSAAATNAGAVARQVLERLPGGGADSHVSYTQDRYVFHAKRTDGITALCMADDAAGRRIPFAFLEDIHGKFVKTYGRAALTALAYAMNDEFSRVLSQQMDYYSNDPSADQINRMRGEISQVRSVMIDNIDKVLERGDRLDLLVDKTTTMQGNTVRFKRQARRYRSTTWWRNVKLTAALILLLLVIVYIALFFVCHGFTLPTCIR*	221	24752.5	9.48
TraesCS7D02G136300	TaVAMP712-7D	R	666	MPILYAVVARGATVLAEHSAAATNAGAVARQVLERLPGGGADSHVSYTQDRYVFHAKRTDGITALCMADDAAGRRIPFAFLEDIHGKFVKTYGRAALTALAYAMNDEFSRVLSQQMDYYSNDPSADQINLMRGEISQVRSVMIDNIDKVLERGDRLDLLVDKTTTMQGNTVRFKRQARRYRSTTWWRNVKLTAALILLLLVIVYIALFFVCHGFTLPTCIR*	221	24709.5	9.34
TraesCS7A02G328000	TaVAMP713-7A	R	669	MAIVYALVARGTVVLAEFAAVSGNAGAVARRILEKLPSEAEARLCFAQDRYIFHVLRSPADGLTFLCMANDTFGRRVPFIYLEDIQMRFMKNYGRVAHSALAYAMNDEFARVLHQQMEFFSSNPSADTLNRLRGEVSEIHTVMVDNIEKILDRGDRISLLVDKTSTMQDSGFHFRKQSKRLRRALWMKNVKLLAVLTAVIVLLLYLIIAAFCGGLSLPSCRS*	222	24966.2	9.44
TraesCS7B02G228700	TaVAMP713-7B	R	669	MAIVYALVARGTVVLAEFAAVSGNAGAVARRILEKLPSEAEARLCFAQDRYIFHVLRSPADGLTFLCMANDTFGRRVPFIYLEDIQMRFMKNYGRVAHSALAYAMNDEFARVLHQQMEFFSSNPSADTLNRLRGEVSEIHTVMVDNIEKILDRGDRISLLVDKTSTMQDSGFHFRKQSKRLRRALWMKNVKLLAVLTAVIVLLLYLIIAAFCGGLSLPSCRS*	222	24966.2	9.44
TraesCS7D02G324800	TaVAMP713-7D	R	669	MAIVYALVARGTVVLAEFAAVSGNAGAVARRILEKLPSEAEARLCFAQDRYIFHVLRSPADGLTFLCMANDTFGRRVPFIYLEDIQMRFMKNYGRVAHSALAYAMNDEFARVLHQQMEFFSSNPSADTLNRLRGEVSEIHTVMVDNIEKILDRGDRISLLVDKTSTMQDSGFHFRKQSKRLRRALWMKNVKLLAVLTGVIVLLLYLIIAAFCGGLSLPSCRS*	222	24952.2	9.44
TraesCS5A02G449900	TaVAMP721-5A	R	672	MGQQSLIYAFVARGTVVLAEYTEFTGNFTTIASQCLVKLPASNNKFTYNCDGHTFNYLVEDGFTYCVVAVESVGQQMPIAFLVRVKDDFSKRYAGGKAATAAPSSLNREFGSKLKEHMQYCVDHPEEINKLAKVQAQVSEVKNVMMENIEKVLDRGEKIELLVDKTENLRSQAQDFRQQGTQVRRKMWLQNMKIKLIVLGIIVALILIIILSVCHGFNCGKSK*	223	25052.1	8.83
TraesCS5B02G457700	TaVAMP721-5B	R	669	MGQQSLIYAFVARGTVVLAEYTEFTGNFTTIASQCLVKLPASNNKFTYNCDGHTFNYLVEDGFTYCVVAVESVGQQMPIAFLVRVKDDFSKRYAGGKAATAAPSSLNREFGSKLKEHMQYCVDHPEEINKLAKVQAQVSEVKNVMMENIEKVLDRGEKIELLVDKTENLRSQAQDFRQQGTQVRRKMWLQNMKIKLIVLGIIVALILIIILSVCHGFNCGKK*	222	24965	8.83
TraesCS5D02G459900	TaVAMP721-5D	R	669	MGQQSLIYAFVARGTVVLAEYTEFTGNFTTIASQCLVKLPASNNKFTYNCDGHTFNYLVEDGFTYCVVAVESVGQQMPIAFLVRVKDDFSKRYAGGKAATAAPSSLNREFGSKLKEHMQYCVDHPEEINKLAKVQAQVSEVKNVMMENIEKVLDRGEKIELLVDKTENLRSQAQDFRQQGTQVRRKMWLQNMKIKLIVLGIIVALILIIILSVCHGFNCGKK*	222	24965	8.83
TraesCS5A02G003100	TaVAMP722-5A	R	699	MAPQGKGEGEGGQKMTMIYAMVARGTMVVAEHTAYTGNFRDIAAQCLHKLPAGDSRFTYTCDGHAFTFLLHQGYAYCVVATESAGREVPLAFLERIKEEFNKRYAGGKAATATANSLTKDFGPRLKEQMQYCMDHPEEVSRLSKVQAQVSEVKGIMMENIDKVIDRGEQIEGLVTRTEQLHDHALDFRTEGTRIRRRMWYQNMKIKLIVAGIVVAIILIIVLSICHRDHCKS*	232	26043.1	8.49
TraesCS5D02G003800	TaVAMP722-5D	R	696	MARKGEGAGPNPPATTMIYAMVARGTLVVAEHTAYTGNFRDIAAQCLHKLPAGDSRFTYTCDGHTFTFLLHQGYAYCVVATESAGREVPLAFLERIKEEFNKRYAGGKAATATANSLSKDFGPRLKEQMQYCMDHPEEVSRLSKVQAQVSEVKGIMMENIDKVIDRGEQIDGLVTRTEQLHDHAMDFRTEGTRLRRRMWYQNMKIKLIVAGIVVAIILIIVLSICHRDHCK*	231	25906.9	8.7
TraesCS3B02G193500	TaVAMP723-3B	R	1347	MGKQSLIYAFVARSTVVLAEYTEFTGNFTTIASQYLGKLPASNNKSTYNCDGHTFNYLVEDGFTYCVVAVESVGQQIPIAFLVRVKDDFSKRYAGGKAATAAPSSLNREFRSKLKEHMQYCVDHPEEINKLAKVQAQVSEVKNLMMENTEKVFDRGEKIELLVDKIENLSSQVLSASLTNAAKELEAEINEGGNAPNQDAAVPWIGLRKRFLAPVRKQGARRTCVFEASMVTTETHYKVNYNAKSPPEEFNYCLSLSDFKVYTSHTGKVLGANGSGGSLENCMEVLKEVGVRGVDMASEKKSEERFKIHAYRKFRRKDIHEVMLLLDQGKALAASFPISDNWKSMNGVGVYEFQEERALPHLHRKGKFRGHSVMIVGYFPDSLEEDLAALKSKDDIEEQ…	448	49817.8	6.81
TraesCS4A02G021800	TaVAMP724-4A	R	669	MGPPPKKLVYSFVGRGTTVLADHAEASGNFASVAAQCLQKLPPNNNRLSYNCDGHTFNYHIHDGFTYCVVATESAGRQLPIGFIERVKEDFAKKYSGGKAKTAGPNSLKREFGPKLKEHMKYCDLHPEEIDKLAKVKAQVSEVKGVMMQNIEKVLDRGEKIELLVDKTEDLRSQAQDFKKQGTKIRQKMWWENMKIKLIAFGIIVLLILCIILTVCRDFKCW*	222	25119.3	9.23
TraesCS4B02G281700	TaVAMP724-4B	R	765	MGPPPKKLVYSFVGRGTTVLADHAEASGNFASVAAQCLQKLPPNNNRLSYNCDGHTFNYHIHDGFTYCVVATESAGRQLPIGFIERVKEDFAKKYSGGKAKTAGPNSLKREFGPKLKEHMKYCDLHPEEIDKLAKVKAQVSEVKGVMMQNIEKVLDRGEKIELLVDKTEDLRSQVSYTHTQLDSIFSFLCHHPRCMTYLVIFACLQAQDFKKQGTKIRQKMWWENMKIKLIAFGIIVLLILCIILTVCRDFKCW*	254	28876.8	9.07
TraesCS4D02G280300	TaVAMP724-4D	R	669	MGPPPKKLVYSFVGRGTTVLADHAEASGNFASVAAQCLQKLPPNNNRLSYNCDGHTFNYHIHDGFTYCVVATESAGRQLPIGFIERVKEDFAKKYSGGKAKTAGPNSLKREFGPKLKEHMKYCDLHPEEIDKLAKVKAQVSEVKGVMMQNIEKVLDRGEKIELLVDKTEDLRSQAQDFKKQGTKIRQKMWWENMKIKLIAFGIIVLLILCIILTVCRDFKCW*	222	25119.3	9.23
TraesCS7A02G279100	TaVAMP725-7A	R	729	MNGGSKQTLIYSFVAKGSVVLAEHTAFSGNFSTIAVQCLQKLPSNSTRSTYSCDGHTFNFLVDRGFVFLVVAEEALGRSVPFVFLERVREDFMQRYGSSIDEEGQHPLADDADEDDFLFEDRFSIAYNLDREFGPRLKDHMQYCINHPEEISKLSKVKSHLSEVKGIMMDNIEKILDRGEKIELLVGKTETLQSQADSFHRHGRELRRKMWLQNLRFKLMVCGGIAFLILILWLMVCRGFKC*	242	27730.8	6.25
TraesCS7B02G181100	TaVAMP725-7B	R	729	MNGGSKQTLIYSFVAKGSVVLAEHTAFSGNFSTIAVQCLQKLPSNSTRSTYSCDGHTFNFLVDRDFVFLVVAEEALGRSVPFVFLERVREDFMQRYGSSIDEEGQHPLADDADEDDFLFEDRFSIAYNLDREFGPRLKDHMQYCINHPEEISKLSKVKSHLSEVKGIMMDNIEKILDRGEKIELLVGKTETLQSQADSFHRHGRELRRKMWLQNLRFKLMVGGGIAFLILILWLMVCWGFKC*	242	27772.8	5.92
TraesCS7D02G278900	TaVAMP725-7D	R	729	MNGGSKQTLIYSFVAKGSVVLAEHTAFSGNFSTIAVQCLQKLPSNSTRSTYSCDGHTFNFLVDSGFVFLVVAEEALGRSVPFVFLERVREDFMQRYGSSIDEEGQHPLADDADEDDFLFEDRFSIAYNLDREFGPRLKDHMQYCINHPEEISKLSKVKSHLSEVKGIMMDNIEKILDRGEKIELLVGKTETLQSQADSFHRHGRELRRKMWLQNLRFKLMVGGGIAFLILILWLMVCRGFKC*	242	27615.7	6.08
TraesCS7A02G321000	TaVAMP726-7A	R	1173	MTETPLWPITDSGIWIPMLAPTYSMMISSDEPRCRGFNQSCIQFPLSIGHISNSGVVSHENKRVEMDLAALSQTSAGNHDDRTQRNRNLTGKSLRHLPHGQRPSDPPSSPRQAATPFLSRSVKLVSSRAKPLEVDVAEEDPRMSSSADNTVYCCIAKGNKVIYSYSSKDGDSQTEATAALCLENVPPYHRHYIHTSGSRSYGYLMADGHTFFAIIDPSVGHVGALQFLERVQDEFRNTNRNGFHDALVPAVQRLVASLEKMPRAALVPEGGAQRGGSNGSSGCTSSKAPLLGKGSGRKDKKKAKEKGMPMGDGDDEHHGTRGLRIDVQPEDVGGMSLERSTSQSRLRRQQSSRSLWMRHVKIIIIVDVLVCVVLFAAWLAVCKGFQCVSG*	390	42614.2	9.01
TraesCS7B02G221800	TaVAMP726-7B	R	834	MNSRRSRSVKLLSSRAKPLEVDVAEEDPRMSSSADNTVYCCIAKGNKVIYSYSSKDGDSQTEATAALCLENVPPYHRHYIHTSGSRSYGYLMADGHTFFAIIDPSVGNVGALQFLERVRDEFRNTNRNGFHDALVPAVQRLVASLEKMPRAALVPEGGAQRGGSNGSSGCTSSKAPLLGKGSGRKDKKKAKEKGMPMGDGDDEHHGTRGLRIDVQPEDVGGMSLERSTSQSRLRRQQSSRSLWMRHVKIIIIVDVLVCVVLFAAWLAVCKGFQCVSG*	277	30216.3	9.34
TraesCS7D02G318000	TaVAMP726-7D	R	834	MNSRRSRSVKLLSSRAKPLEVDVAEEDPRMSSSADNTVYCCIAKGNKVIYSYSSKDGDSQTEATAALCLENVPPYHRHYIHTSGSRSYGYLMADGHTFFAIIDPSVGNVGALQFLERVRDEFRNTNRNGFHDTLVPAVQRLVASLEKMPRAALVPEGGAQRGGSNGSSGCTSSKAPLLGKGSGRKDKKKAKEKGMPMGDGEDEHHGTRGLRIDVQPEDVGGMSLERSTSQSRLRRQQSSRSLWMRHVKIIIIVDVLVCVVLFAAWLAVCKGFQCVSG*	277	30260.4	9.34
TraesCS3A02G511400	TaYKT61-3A	R	654	MKITALLVLRSPGDASSSSSSVTAVGGAGGGEPQQAAVLANASDVTRFGFFQRPAAREFIVFVARTVALRTRAGTRQTVQHQEYKVHCYNQGGLCAVAFTDDHYPVRGAFSLLGKVLEEYLKSFGESWRTAEDKATQHWQYLDDALAKYQDPAEADKLMKIQRDLDETKIILHKTIDSVLQRGERLDSLVEKSSDLSVASQMFYKQAKKTNSCCTIL*	217	23956.1	8.3
TraesCS3B02G579700	TaYKT61-3B	R	648	MKITALLVLRSPGDASSSSSSTAGGGGGGELQQAAVLANASDVTRFGFFQRPAAREFIVFVARTVALRTRAGTRQTVQHQEYKVHCYNQGGLCAVAFTDDHYPVRSAFSLLSKVLEEYLRSFGESWRTAEDKAAQHWQYLDDSLTKYQDPAEADKLLKIQRDLDETKIILHKTIDSVLQRGERLDSLVEKSSDLSVASQMFYKQAKKTNSCCTIL*	215	23845.9	8.31
TraesCS3D02G519200	TaYKT61-3D	R	648	MKITALLVLRSPGDASSSSSSSAGGGGAGEQQQAAVLANASDVTRFGFFQRPAAREFIVFVARTVALRTRAGTRQTVQHQEYKVHCYNQGGLCAVAFTDDHYPVRSAFSLLGKVLEEYLKSFGDSWRTAEDKATQHWQYLDDALAKYQDPAEANKLMKIQRDLDETKIILHKTIDSVLQRGERLDSLVEKSSDLSVASQMFYKQAKKTNSCCTIL*	215	23789.9	8.62
TraesCS3A02G377500	TaYKT62-3A	R	633	MKITALVVLKPSAGGVGGSSSSGGQGSEALVLANATDVSHFGFFQRGAAREFIVFVARTVAQRTQPGQRQSVQHEEYKVHSHNRNGLCVVAFMDDHYPVRSAFSLLNKVLDEYQKAFGDAWKAATADSTQEWPFLMEALTKFQDPAEADKLTKIQRDLDETKIILHKTIENVLQRGERLDSLVEKSSDLSAASQMFYKQAKKTNSCCTIL*	210	23199.3	7.74
TraesCS3B02G410300	TaYKT62-3B	R	633	MKITALVVLKPSAGGAGGSSSSGGQGSEALVLANATDVSHFGFFQRGAAREFIVFVARTVAQRTQPGQRQSVQHEEYKVHSHNRNGLCVVAFMDDHYPVRSAFSLLNKVLDEYQKAFGDAWKAATADSTQEWPFLMEALTKFQDPAEADKLTKIQRDLDETKIILHKTIENVLQRGERLDSLVEKSSDLSAASQMFYKQAKKTNSCCTIL*	210	23171.2	7.74
TraesCS3D02G370600	TaYKT62-3D	R	633	MKITALVVLKPSAGGAGGSSSSGGQGSEALVLANATDVSHFGFFQRGAAREFIVFVARTVAQRTQPGQRQSVQHEEYKVHSHNRNGLCVVAFMDDHYPVRSAFSLLNKVLDEYQKAFGDAWKAATADSTQEWPFLMEALTKFQDPAEADKLTKIQRDLDETKIILHKTIENVLQRGERLDSLVEKSSDLSAASQMFYKQAKKTNSCCTIL*	210	23171.2	7.74
