# Supplementary material for: Genome-wide identification, evolution, and expression of the SNARE gene family in wheat resistance to powdery mildew
Source: PeerJ. 2021 Jan 22;9:e10788. doi: 10.7717/peerj.10788 (PMC7831368; doi:10.7717/peerj.10788)
Supplement: Supplemental Information 2 [file peerj-09-10788-s002.xlsx]

## Sheet: sheet1
Name	ID	Cis-I	Cis-II	Cis-III	Cis-IV	Cis-V	Cis-VI	Cis-VII	Cis-VIII	Cis-IX		Cis-I	Cis-II	Cis-III	Cis-IV	Cis-V	Cis-VI	Cis-VII	Cis-VIII	Cis-IX
TaBET1-6A	TraesCS6A01G399100	1	28	11	4	0	1	0	0	0		ARE1	GT1CONSENSUS	MYB1ATMYB1LEPRMYB26PS	RAV1AAT	LECPLEACS2	ELRENTCHN50	AAGACGTAGATACL12	HBOXPVCHS15	AUXREPSIAA4
TaBET1-6B	TraesCS6B01G439400	2	30	11	8	4	3	2	2	2		ASF1MOTIFCAMV	GT1CORE	MYB2AT	AMMORESIIUDCRNIA1	AGCBOXNPGLB	GCN4OSGLUB1	BOXIIPCCHS	HBOXCONSENSUSPVCHS	AUXRETGA2GMGH3
TaBET1-6D	TraesCS6D01G383300	1	26	14	5	1	3	1	1	1		WBBOXPCWRKY1	GT1GMSCAM4	MYB2CONSENSUSAT	GCCCORE		HEXMOTIFTAH3H4	BP5OSWX		ARFAT
TaGOS11-5A	TraesCS5A01G226000	16	27	13	9	2	2	3	2	4		WBOXATNPR1	GT1MOTIFPSRBCS	MYBATRD22			PALINDROMICCBOXGM			AUXRETGA1GMGH3
TaGOS11-5B	TraesCS5B01G224500	19	14	9	5	0	0	0	0	2		WBOXHVISO1	GTGANTG10	MYBCORE			QELEMENTZMZM13			GAREAT
TaGOS12-6A	TraesCS6A01G088900	29	27	16	7	1	1	2	1	3		WBOXNTCHN48	SEBFCONSSTPR10A	MYBPLANT			TGTCACACMCUCUMISIN			NTBBF1ARROLB
TaGOS12-6B	TraesCS6B01G111300	23	39	7	7	2	1	1	1	2		WBOXNTERF3	DOFCOREZM	MYBCOREATCYCB1			UPRE2ATandUPRMOTIFIAT
TaGOS12-U	TraesCSU01G017400	14	31	11	1	1	2	2	1	2		WRECSAA01	BIHD1OS	MYBGAHV
TaMEMB-4A	TraesCS4A01G299300	6	39	10	2	1	3	1	1	1		WRKY71OS		MYBPZM
TaMEMB-4B	TraesCS4B01G014100	18	36	10	10	3	3	3	3	3				MYBST1
TaMEMB-4D	TraesCS4D01G012300	10	18	7	2	0	3	0	0	1
TaNPSN11-7A	TraesCS7A01G385500	17	36	9	2	0	0	0	0	1
TaNPSN11-7B	TraesCS7B01G288400	17	29	4	6	0	2	0	0	0
TaNPSN11-7D	TraesCS7D01G382100	11	27	3	9	0	2	0	0	0
TaNPSN12-4A	TraesCS4A01G162300	12	71	9	6	0	0	1	0	3
TaNPSN12-4B	TraesCS4B01G157900	6	17	8	3	0	0	0	0	1
TaNPSN12-4D	TraesCS4D01G161700	9	21	8	2	0	0	0	0	1
TaNPSN13-2A	TraesCS2A01G149700	33	50	17	2	1	1	1	1	1
TaNPSN13-2B	TraesCS2B01G174800	7	23	9	12	4	2	1	1	1
TaNPSN13-2D	TraesCS2D01G154800	6	19	13	19	2	2	1	1	1
TaSEC201-2B	TraesCS2B01G101900	14	26	15	5	1	3	1	1	1
TaSEC202-3A	TraesCS3A01G132200	15	26	13	8	2	4	2	1	2
TaSEC202-U	TraesCSU01G049300	21	24	11	2	1	2	1	1	2
TaSEC203-6A	TraesCS6A01G248900	17	29	9	7	3	2	2	2	4
TaSEC203-6B	TraesCS6B01G275900	11	43	8	7	1	2	1	0	2
TaSEC203-6D	TraesCS6D01G231000	8	32	10	3	1	1	2	1	2
TaSEC204-3A	TraesCS3A01G074700	11	30	10	8	0	1	0	0	1
TaSEC221-3A	TraesCS3A01G157800	4	27	8	1	1	2	1	1	1
TaSEC221-3B	TraesCS3B01G184700	11	24	11	3	1	2	1	1	1
TaSEC221-3D	TraesCS3D01G165300	11	22	15	3	1	3	2	1	3
TaSEC222-5A	TraesCS5A01G428800	16	42	19	4	3	5	3	3	6
TaSEC222-5B	TraesCS5B01G430800	19	87	7	3	2	2	2	2	4
TaSEC222-5D	TraesCS5D01G436900	7	86	10	3	2	2	2	2	3
TaSFT11-2A	TraesCS2A01G187500	5	33	11	8	2	3	2	2	3
TaSFT11-2B	TraesCS2B01G219800	21	32	10	3	1	2	1	1	2
TaSFT11-2D	TraesCS2D01G200400	16	29	14	3	2	2	2	2	2
TaSNAP1-2A1	TraesCS2A01G180800	26	21	7	9	1	0	1	0	2
TaSNAP1-2A2	TraesCS2A01G181400	14	19	10	2	1	1	1	1	5
TaSNAP1-2B	TraesCS2B01G208000	4	15	10	2	1	1	1	1	4
TaSNAP1-2D	TraesCS2D01G189300	14	17	12	4	1	2	1	1	1
TaSNAP2-3A	TraesCS3A01G391300	8	32	5	2	1	4	1	1	3
TaSNAP2-3B	TraesCS3B01G423500	14	22	8	0	0	0	0	0	2
TaSNAP2-3D	TraesCS3D01G384300	14	25	6	2	0	1	0	0	0
TaSNAP3-4A	TraesCS4A01G435200	19	32	5	3	1	0	0	0	0
TaSNAP3-7A	TraesCS7A01G049300	7	18	9	12	2	3	1	1	1
TaSNAP3-7D	TraesCS7D01G044400	24	34	6	4	2	2	1	1	2
TaSNAP4-4A	TraesCS4A01G055800	3	34	7	16	0	0	0	0	0
TaSNAP4-4B	TraesCS4B01G249000	10	54	17	28	1	1	1	1	3
TaSNAP4-4D	TraesCS4D01G249100	19	26	16	10	1	1	1	1	3
TaSYP111-6A	TraesCS6A01G147100	14	34	6	2	0	0	0	0	2
TaSYP111-6B	TraesCS6B01G175300	24	33	6	2	0	1	0	0	1
TaSYP111-6D	TraesCS6D01G136400	17	22	8	7	0	0	0	0	3
TaSYP112-4A	TraesCS4A01G247700	10	21	10	2	0	2	1	0	1
TaSYP112-4B1	TraesCS4B01G067100	19	19	13	7	1	2	0	0	1
TaSYP112-4B2	TraesCS4B01G067200	16	17	17	8	4	4	4	3	4
TaSYP112-4D	TraesCS4D01G066100	20	24	13	4	0	0	2	0	3
TaSYP121-5A	TraesCS5A01G425600	22	20	14	5	1	1	1	1	1
TaSYP121-5B	TraesCS5B01G427600	20	23	10	3	0	1	0	0	1
TaSYP121-5U	TraesCSU01G076400	15	19	9	3	0	0	0	0	0
TaSYP122-6A	TraesCS6A01G182200	4	33	6	4	0	1	1	0	0
TaSYP122-6B	TraesCS6B01G211000	9	19	6	5	0	0	1	0	3
TaSYP122-6D	TraesCS6D01G169800	3	28	6	3	1	3	2	1	1
TaSYP123-7A	TraesCS7A01G368400	15	17	9	3	0	1	0	0	0
TaSYP123-7B	TraesCS7B01G260100	17	37	6	7	1	0	0	0	1
TaSYP123-7D	TraesCS7D01G354500	18	32	4	9	0	0	0	0	1
TaSYP131-1A	TraesCS1A01G088800	7	22	7	9	4	0	0	0	2
TaSYP132-2A	TraesCS2A01G219200	2	59	5	3	1	0	0	0	0
TaSYP132-2B	TraesCS2B01G244700	6	47	9	2	1	0	0	0	1
TaSYP132-2D	TraesCS2D01G224100	10	48	7	2	1	0	0	0	0
TaSYP133-2B	TraesCS2B01G238200	11	35	2	0	0	1	0	0	1
TaSYP133-2D	TraesCS2D01G219400	11	19	9	4	0	0	0	0	1
TaSYP134-2A	TraesCS2A01G246600	9	19	14	5	0	0	0	0	1
TaSYP134-2B	TraesCS2B01G263700	9	33	16	4	1	3	1	1	2
TaSYP134-2D	TraesCS2D01G248900	10	26	14	9	2	2	2	2	3
TaSYP135-5A	TraesCS5A01G240200	6	18	6	8	0	0	0	0	0
TaSYP136-5B1	TraesCS5B01G034800	25	39	3	3	1	3	3	1	2
TaSYP136-5B2	TraesCS5B01G035600	13	26	8	6	0	1	1	0	1
TaSYP137-5A	TraesCS5A01G096800	9	41	8	6	1	1	1	1	3
TaSYP137-5B	TraesCS5B01G102700	4	41	6	4	0	0	0	0	3
TaSYP137-5D	TraesCS5D01G109500	8	33	7	5	0	0	0	0	3
TaSYP138-7A	TraesCS7A01G481800	20	35	6	9	0	0	0	0	1
TaSYP138-7B	TraesCS7B01G394300	16	27	9	7	0	2	0	0	2
TaSYP221-3A	TraesCS3A01G175000	19	37	9	5	1	1	1	1	1
TaSYP221-3D	TraesCS3D01G180500	12	38	8	3	0	1	0	0	1
TaSYP222-6A	TraesCS6A01G271000	15	26	4	3	0	0	0	0	3
TaSYP222-6B	TraesCS6B01G298100	21	37	14	11	2	2	2	2	3
TaSYP222-6D	TraesCS6D01G244100	5	35	8	1	0	0	1	0	2
TaSYP223-7A	TraesCS7A01G181800	7	7	10	12	1	2	1	1	1
TaSYP3-3A	TraesCS3A01G119100	16	32	5	2	1	2	1	1	1
TaSYP3-3B	TraesCS3B01G138100	18	37	14	5	1	4	2	1	1
TaSYP3-3D	TraesCS3D01G121000	11	30	10	1	0	1	0	0	0
TaSYP4-4A	TraesCS4A01G435000	6	44	7	5	1	2	1	1	5
TaSYP4-7A	TraesCS7A01G049200	20	33	10	5	0	0	0	0	2
TaSYP4-7D	TraesCS7D01G044300	10	29	8	1	0	1	0	0	3
TaSYP51-5A	TraesCS5A01G062300	22	25	9	1	1	1	1	1	2
TaSYP51-5B	TraesCS5B01G069400	12	23	6	1	1	1	1	1	3
TaSYP51-5D	TraesCS5D01G073500	15	29	5	1	1	2	1	1	2
TaSYP52-4B	TraesCS4B01G347500	11	43	15	1	1	1	2	1	3
TaSYP53-6A	TraesCS6A01G059100	8	30	6	6	0	0	0	0	1
TaSYP53-6B	TraesCS6B01G079400	3	37	8	1	1	2	1	0	1
TaSYP53-U	TraesCSU01G121500	8	35	15	3	0	1	1	0	2
TaSYP61-1A	TraesCS1A01G276400	14	32	10	5	1	1	0	0	3
TaSYP61-1B	TraesCS1B01G285600	13	27	18	4	0	0	0	0	1
TaSYP61-1D	TraesCS1D01G275900	9	23	10	3	0	1	0	0	1
TaSYP62-3A1	TraesCS3A01G508700	13	21	7	2	0	2	1	0	1
TaSYP62-3A2	TraesCS3A01G508800	13	29	15	19	4	4	3	3	4
TaSYP62-3B	TraesCS3B01G577200	10	10	4	3	0	1	0	0	1
TaSYP62-3D	TraesCS3D01G516200	17	24	8	4	1	1	1	1	4
TaSYP63-4A	TraesCS4A01G049700	8	33	14	2	0	0	0	1	0
TaSYP63-4B	TraesCS4B01G255000	11	43	16	5	2	2	1	1	1
TaSYP63-4D	TraesCS4D01G254800	4	32	10	4	0	0	0	1	1
TaSYP64-4A	TraesCS4A01G208100	21	19	5	7	2	2	1	0	0
TaSYP64-4B	TraesCS4B01G111700	11	24	6	5	2	1	0	0	0
TaSYP64-4D	TraesCS4D01G109300	17	31	7	4	0	1	0	0	2
TaSYP71-1A	TraesCS1A01G379800	22	28	10	5	0	0	1	0	0
TaSYP71-1B	TraesCS1B01G401800	18	23	4	8	2	0	0	0	1
TaSYP71-1D	TraesCS1D01G387200	28	20	8	6	1	0	0	0	0
TaSYP72-1D	TraesCS1D01G190400	9	39	10	5	3	3	3	3	3
TaSYP73-5B	TraesCS5B01G187300	20	18	19	8	1	1	1	1	1
TaSYP73-5D	TraesCS5D01G194900	9	28	15	6	2	2	2	2	3
TaSYP8-2A	TraesCS2A01G372700	10	14	3	10	0	0	0	0	0
TaSYP8-2B	TraesCS2B01G389700	13	21	0	11	0	0	0	0	1
TaSYP8-2D	TraesCS2D01G368900	10	16	3	13	2	1	1	1	2
TaUSE11-6A	TraesCS6A01G028000	25	44	7	4	2	3	2	2	4
TaUSE11-6B	TraesCS6B01G039400	28	52	6	1	0	1	0	0	0
TaUSE11-6D	TraesCS6D01G031300	8	38	4	1	1	0	1	0	3
TaUSE12-6D	TraesCS6D01G059200	10	15	9	2	1	0	0	0	2
TaUSE12-7A	TraesCS7A01G261200	36	37	13	3	0	1	0	0	0
TaUSE12-7B	TraesCS7B01G159900	3	18	5	4	2	2	2	1	1
TaUSE12-7D	TraesCS7D01G263000	18	15	6	10	2	2	1	1	2
TaVAMP711-6A	TraesCS6A01G371800	7	30	9	6	3	2	2	2	3
TaVAMP711-6B	TraesCS6B01G409400	16	29	5	3	1	0	0	0	0
TaVAMP711-6D	TraesCS6D01G355800	24	27	4	4	2	1	1	1	2
TaVAMP712-7A	TraesCS7A01G136300	10	21	17	4	2	2	2	2	2
TaVAMP712-7B	TraesCS7B01G037300	11	23	11	4	1	3	1	1	4
TaVAMP712-7D	TraesCS7D01G136300	9	26	18	8	2	1	1	1	3
TaVAMP713-7A	TraesCS7A01G328000	25	29	9	5	1	1	1	1	3
TaVAMP713-7B	TraesCS7B01G228700	16	22	10	5	0	3	0	0	2
TaVAMP713-7D	TraesCS7D01G324800	25	30	7	7	0	0	0	0	2
TaVAMP721-5A	TraesCS5A01G449900	18	28	9	4	1	2	1	1	2
TaVAMP721-5B	TraesCS5B01G457700	15	28	9	5	2	2	2	2	3
TaVAMP721-5D	TraesCS5D01G459900	18	25	9	5	2	3	2	2	3
TaVAMP722-5A	TraesCS5A01G003100	15	18	14	2	1	1	1	1	4
TaVAMP722-5D	TraesCS5D01G003800	25	12	12	2	1	2	1	1	1
TaVAMP723-3B	TraesCS3B01G193500	8	25	4	4	1	1	1	0	0
TaVAMP724-4A	TraesCS4A01G021800	21	26	11	1	0	0	0	0	1
TaVAMP724-4B	TraesCS4B01G281700	22	40	10	5	0	0	1	0	1
TaVAMP724-4D	TraesCS4D01G280300	12	46	17	5	2	5	2	2	6
TaVAMP725-7A	TraesCS7A01G279100	11	24	8	2	0	1	0	0	2
TaVAMP725-7B	TraesCS7B01G181100	10	25	6	3	0	1	0	0	1
TaVAMP725-7D	TraesCS7D01G278900	10	13	11	4	1	1	1	0	2
TaVAMP726-7A	TraesCS7A01G321000	16	13	17	2	0	0	2	0	1
TaVAMP726-7B	TraesCS7B01G221800	11	24	5	9	4	1	1	1	1
TaVAMP726-7D	TraesCS7D01G318000	19	36	7	3	1	1	1	1	1
TaVTI11-1A	TraesCS1A01G363200	15	21	18	12	1	2	1	1	2
TaVTI11-1B	TraesCS1B01G380400	8	15	11	2	1	0	0	0	0
TaVTI11-1D	TraesCS1D01G368200	14	26	10	4	1	2	0	0	0
TaVTI12-3A	TraesCS3A01G252300	17	35	16	6	0	0	0	2	3
TaVTI12-3B	TraesCS3B01G283800	11	34	9	5	0	2	0	0	3
TaVTI12-3D	TraesCS3D01G252800	13	24	16	6	2	1	2	1	3
TaVTI13-1A	TraesCS1A01G363100	8	44	16	6	1	1	1	1	3
TaVTI13-1B	TraesCS1B01G380300	18	34	8	3	0	0	0	0	1
TaVTI13-1D	TraesCS1D01G368100	6	24	13	7	0	0	1	0	1
TaVTI14-3A	TraesCS3A01G207400	13	30	9	4	0	0	0	0	1
TaVTI14-3B	TraesCS3B01G234600	9	28	10	11	4	3	3	3	4
TaVTI14-3D	TraesCS3D01G208300	7	33	4	1	0	0	0	0	1
TaVTI14-3D2	TraesCS3D01G207900	15	32	3	3	0	1	1	0	1
TaYKT61-3A	TraesCS3A01G511400	9	30	5	7	1	1	1	1	3
TaYKT61-3B	TraesCS3B01G579700	7	24	14	8	3	4	3	3	4
TaYKT61-3D	TraesCS3D01G519200	11	30	12	3	0	0	0	0	1
TaYKT62-3A	TraesCS3A01G377500	11	28	15	6	2	2	2	2	2
TaYKT62-3B	TraesCS3B01G410300	8	28	11	3	3	1	1	1	2
TaYKT62-3D	TraesCS3D01G370600	10	18	8	5	2	1	2	1	1
		36	87	19	28	4	5	4	3	6
		2310	5054	1647	882	170	225	152	118	309	10867
		0.21257	0.465078	0.15156	0.0811632	0.0156437	0.0207049	0.0139873	0.0108586	0.0284347
