# Supplementary material for: Genome-wide identification, evolution, and expression of the SNARE gene family in wheat resistance to powdery mildew
Source: PeerJ. 2021 Jan 22;9:e10788. doi: 10.7717/peerj.10788 (PMC7831368; doi:10.7717/peerj.10788)
Supplement: Supplemental Information 3 [file peerj-09-10788-s003.xlsx]

## Sheet: Sheet1
Actin F	CTTGTATGCCAGCGGTCGAAC
Actin R	CTTGTAATCAAGGGCCACG
BET1 F	GAGGTGGAGGCTCATAACCG
BET1 R	CATGAAGAGCGCGACGAATG
GOS12 F	AAGCCAGATTCGCCAAGCG
GOS12 R	ATTTGGGTTTGCAACGACGC
MEMB F	AATGGTGAGTCGTCGCATGT
MEMB R	CGCTCTTCAGACGATCCCTC
NPSN11 F	GGCAGCTCGAAGAGCTTACT
NPSN11 R	GTGTTGGGATCAACACTGCC
SYP121 F	TTCTTCGAGGACGTGGAGTC
SYP121 R	TTGACGACCTTGGCCTTCTT
SEC203 F	CTGTCCGGAGGCGTAATCTC
SEC203 R	TACTCGCCTTCAGCCTTTCG
SEC222 F	GGCGGAGGGGTTAGATGATG
SEC222 R	ACGCGGCTCTCAATGATGTA
SFT1 F	GTTCGCATGTTGAAAGGCGT
SFT1 R	GCCTGAGCTTTCGTAAGGGT
SNAP1 F	GGGAACTGAGATTGAGGGGC
SNAP1 R	GACGACGGGTTCGAGTGTTT
SYP221 F	TCTTCCAGATCAACACGGCG
SYP221 R	AAGACGATGATCCGCCTCAC
SYP3 F	GGCCAGTGACTCTGCAACTA
SYP3 R	CGACGACGATGCTCCATGAT
SYP4 F	TGGCAGAGATGATCAGCGAG
SYP4 R	GTCTGTAGCAAGGGAACGCT
SYP51 F	CAATCGGCTACTCCCCTCTC
SYP51 R	CATCCATGGGTCCGAAGATGA
SYP62 F	TGGCACAAGCAGAACTAACTACT
SYP62 R	TTGAGGATCCTTTCCTGTCCG
SYP71 F	GAAGGGCTGGCAACTCTGAA
SYP71 R	TGCTTTAGCCTCACGTTGGT
SYP8 F	AGACGCTTGAGAGCATCAGG
SYP8 R	GTTGTCCCTCTCTTGCTCCG
Use12 F	GATCGACGGCTCAGATGGAG
Use12 R	TGGCGTGCTAAGTCAACCAT
VAMP712 F	GTGGTCGAGATGGCCTCG
VAMP712 R	CTCTACTGGAGGAGGCGGAG
VAMP723 F	TTGCAGCGAGCTTCCCAATA
VAMP723 R	GATGCGGTAGTGCCCTTTCT
VTI1 F	GGAGGCTAGGAATACGCCG
VTI1 R	TAGTTTGCCTGGCATTGGGC
YKT6 F1	TGGCCTTTCCTGATGGAAGC
YKT6 R1	CTGTGAAGCAGCACTCAGGT
YKT6 F2	AGTTCATCGTCTTCGTCGCC
YKT6 R2	TCCATAAATGCCACCACGCA
